# Supplementary material
Source: JCI journal article supplement (doi:10.1172/jci200168)

# Uncropped blots

A nutrient-responsive AMPK–TBK1 circuit restricts adipocyte catabolism

**Figure 1C- iWAT**

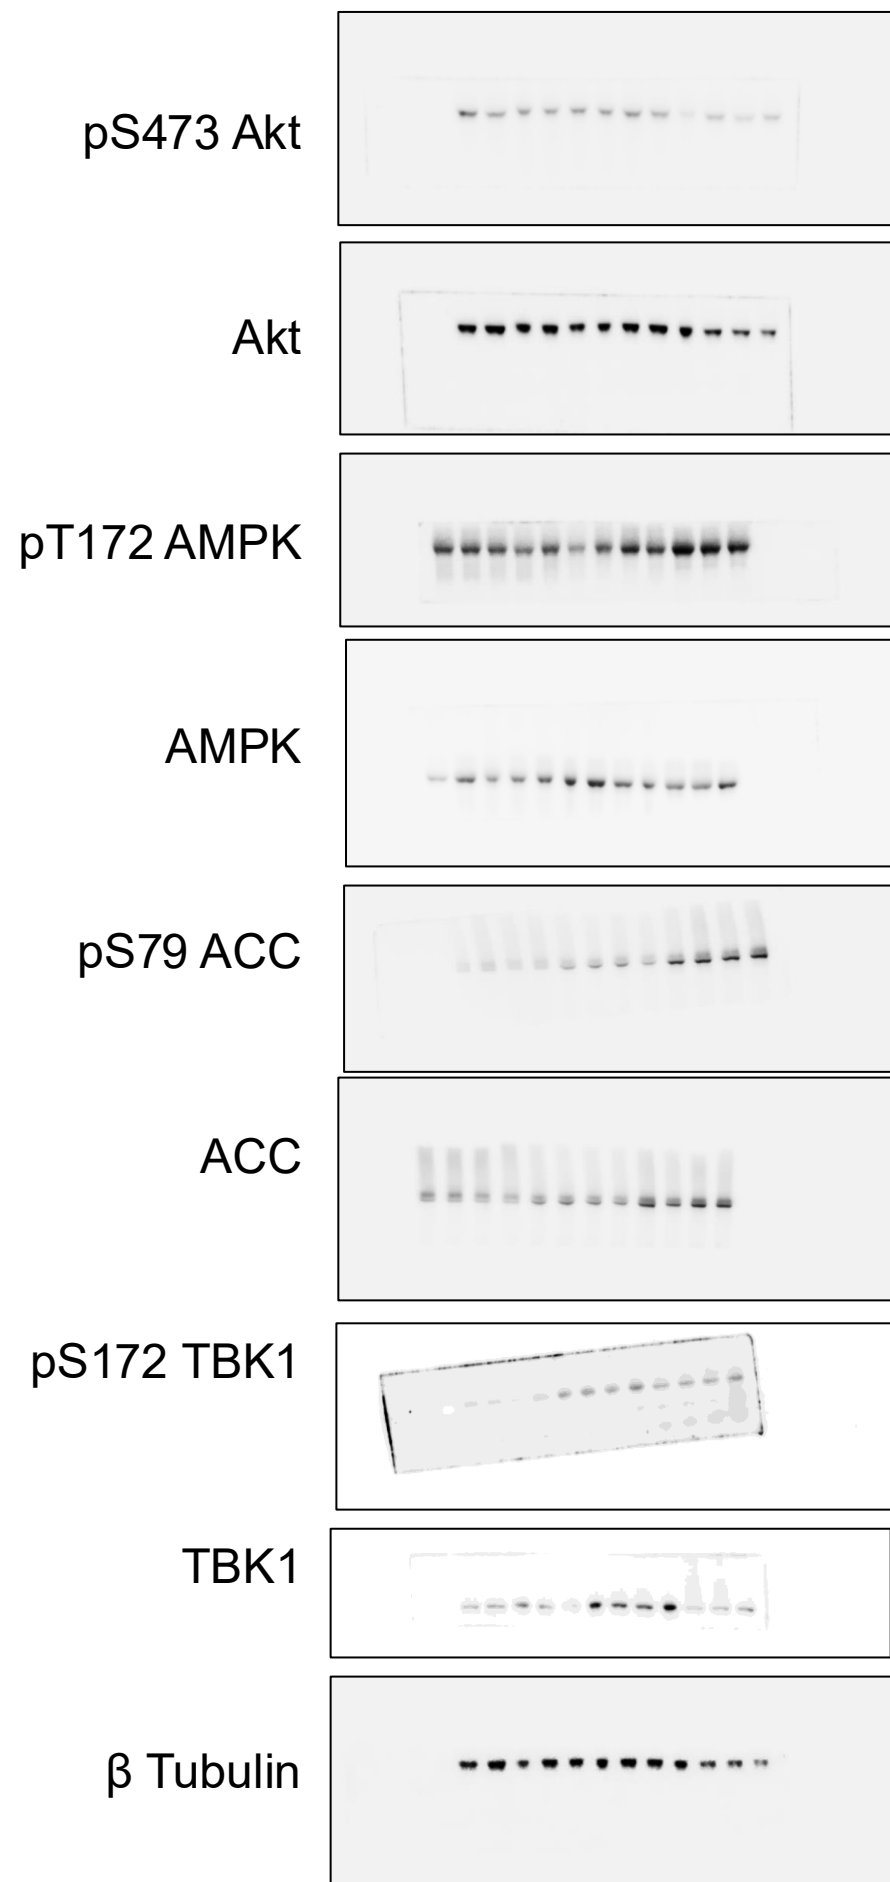

**Figure 2B**

pT172 AMPK

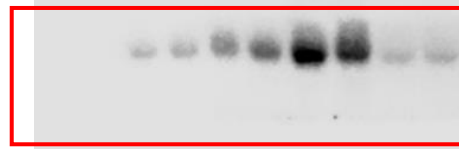

AMPK

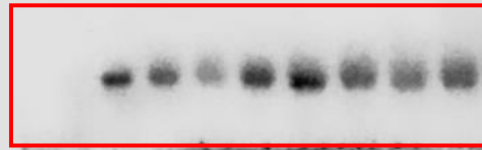

pTBK1

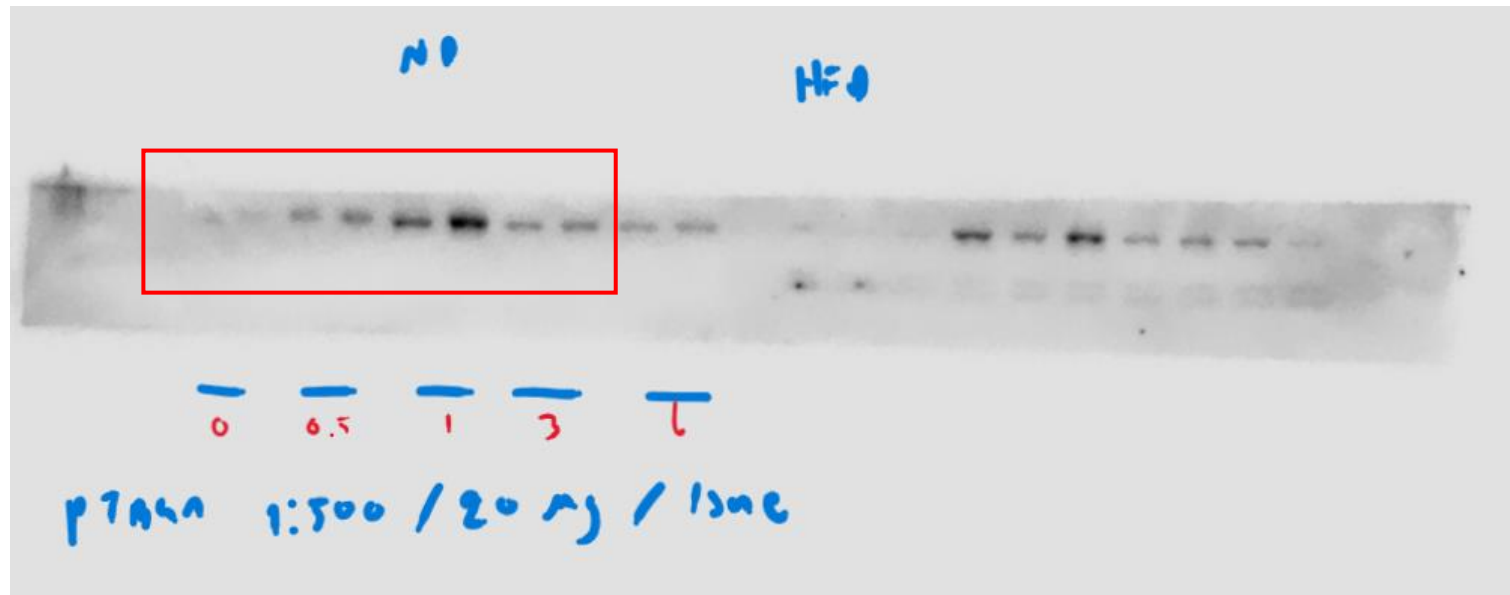

Ra1A

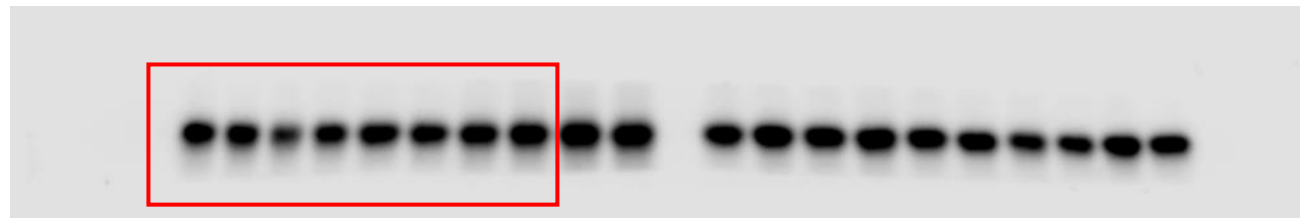

TBK1

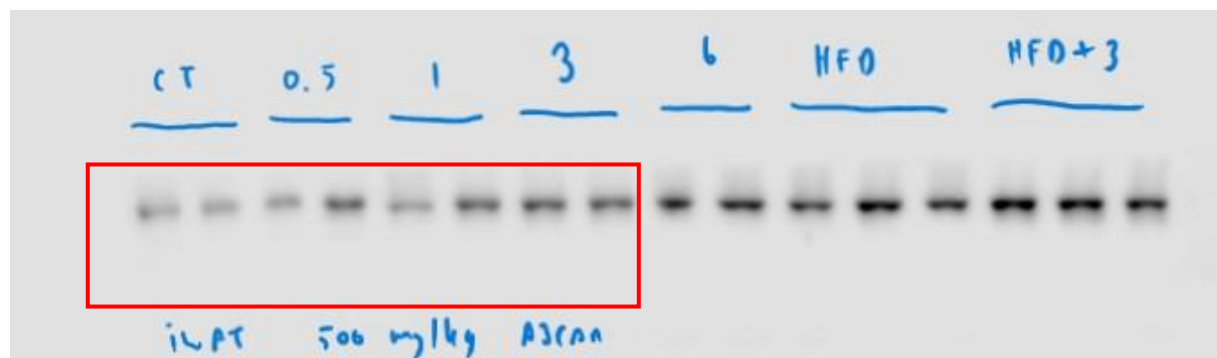

HSP90

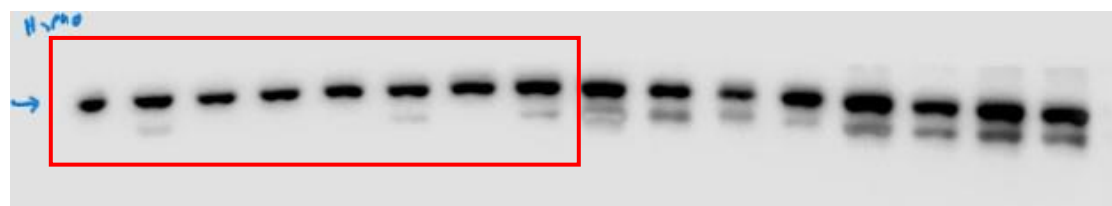

**Figure 3G**

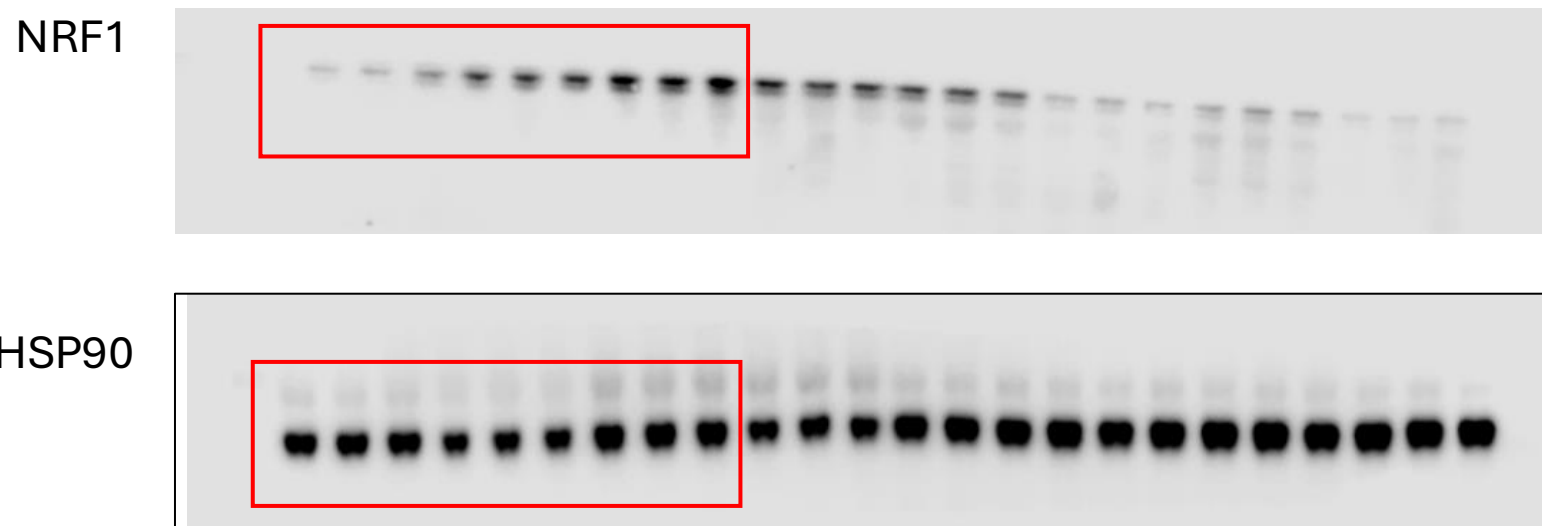

# Figure 5F

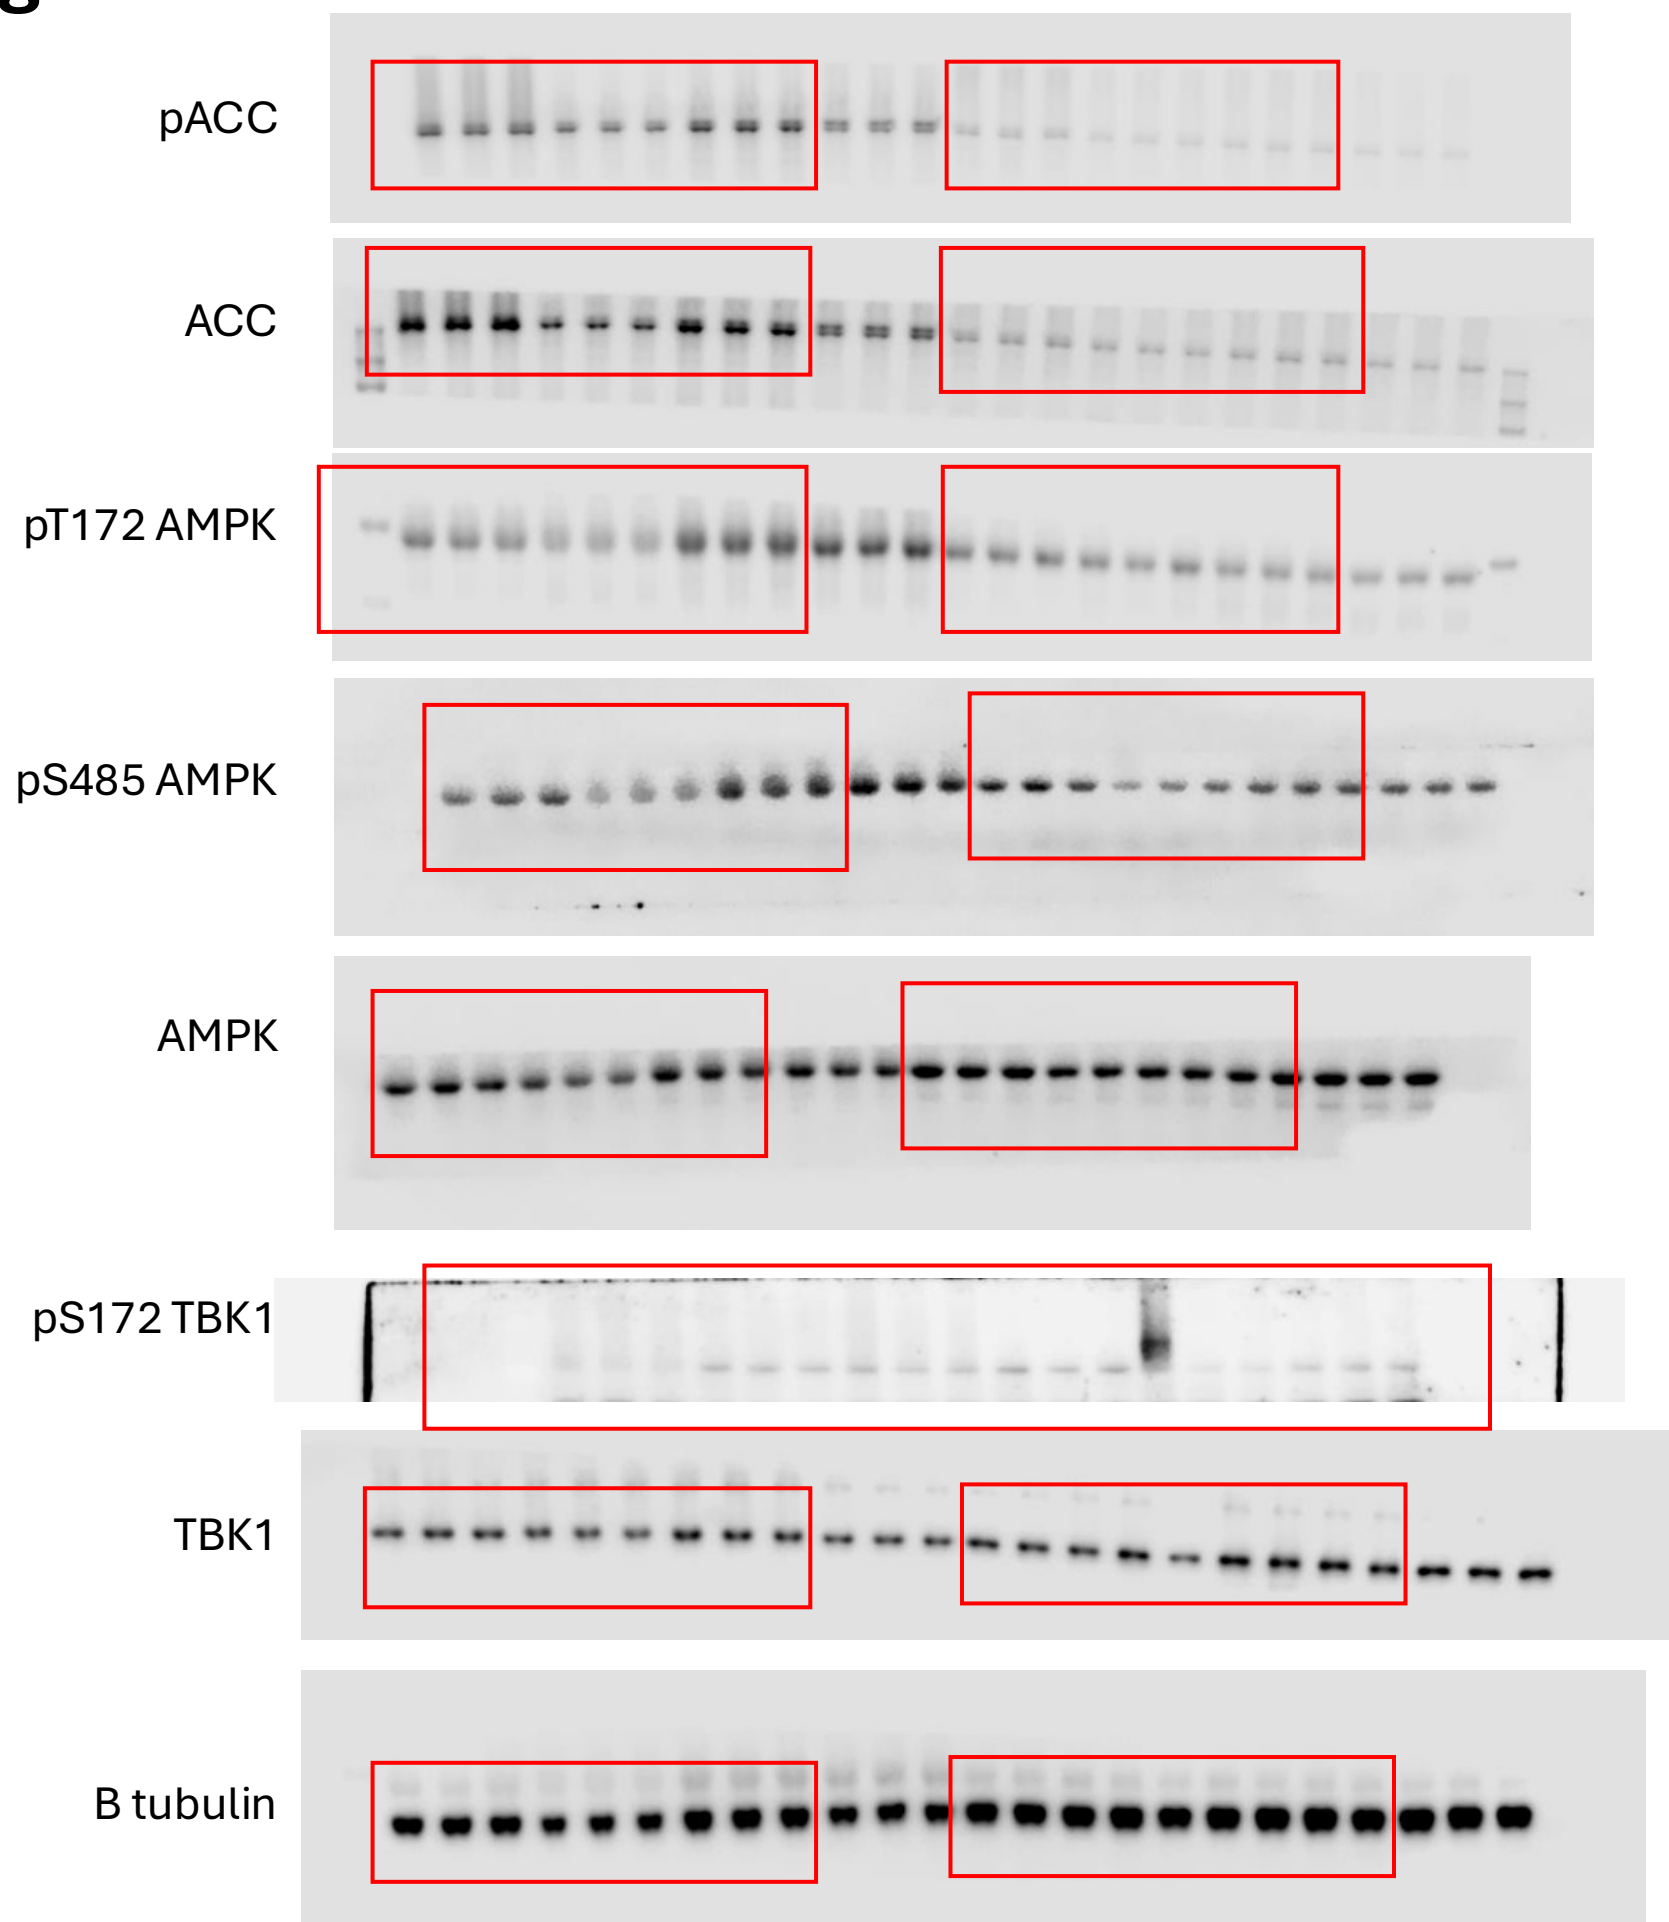

# Figure 6C

pT172 AMPK

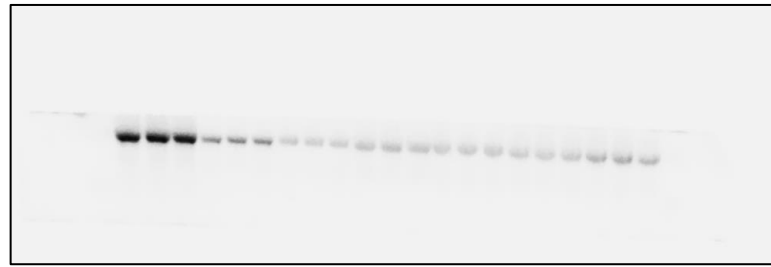

AMPK

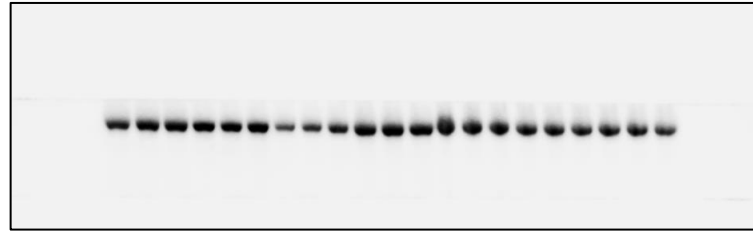

pS79 ACC

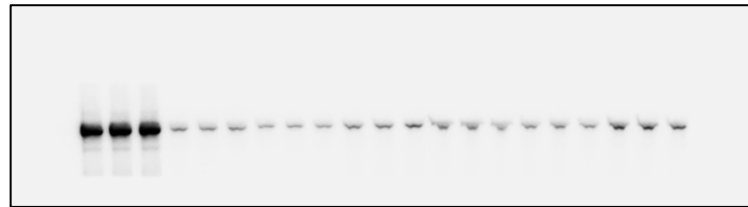

ACC

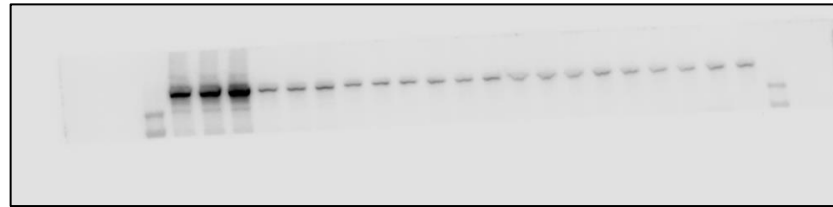

pS172 TBK1

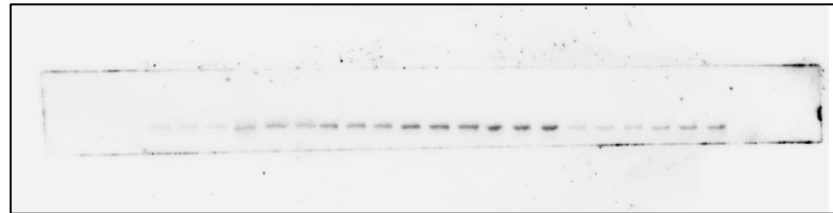

TBK1

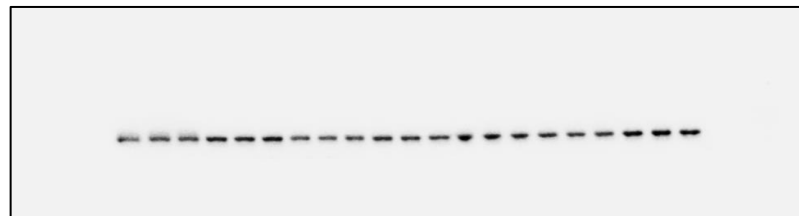

HSP90

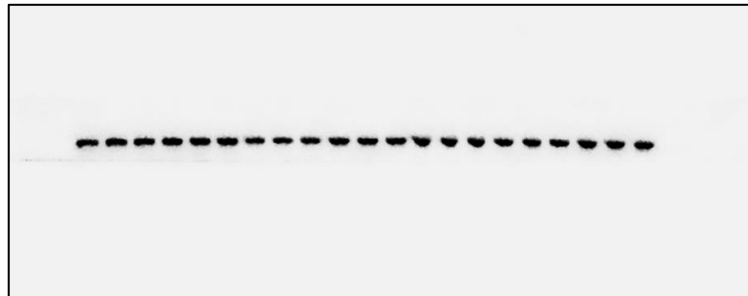

**Figure 7E**

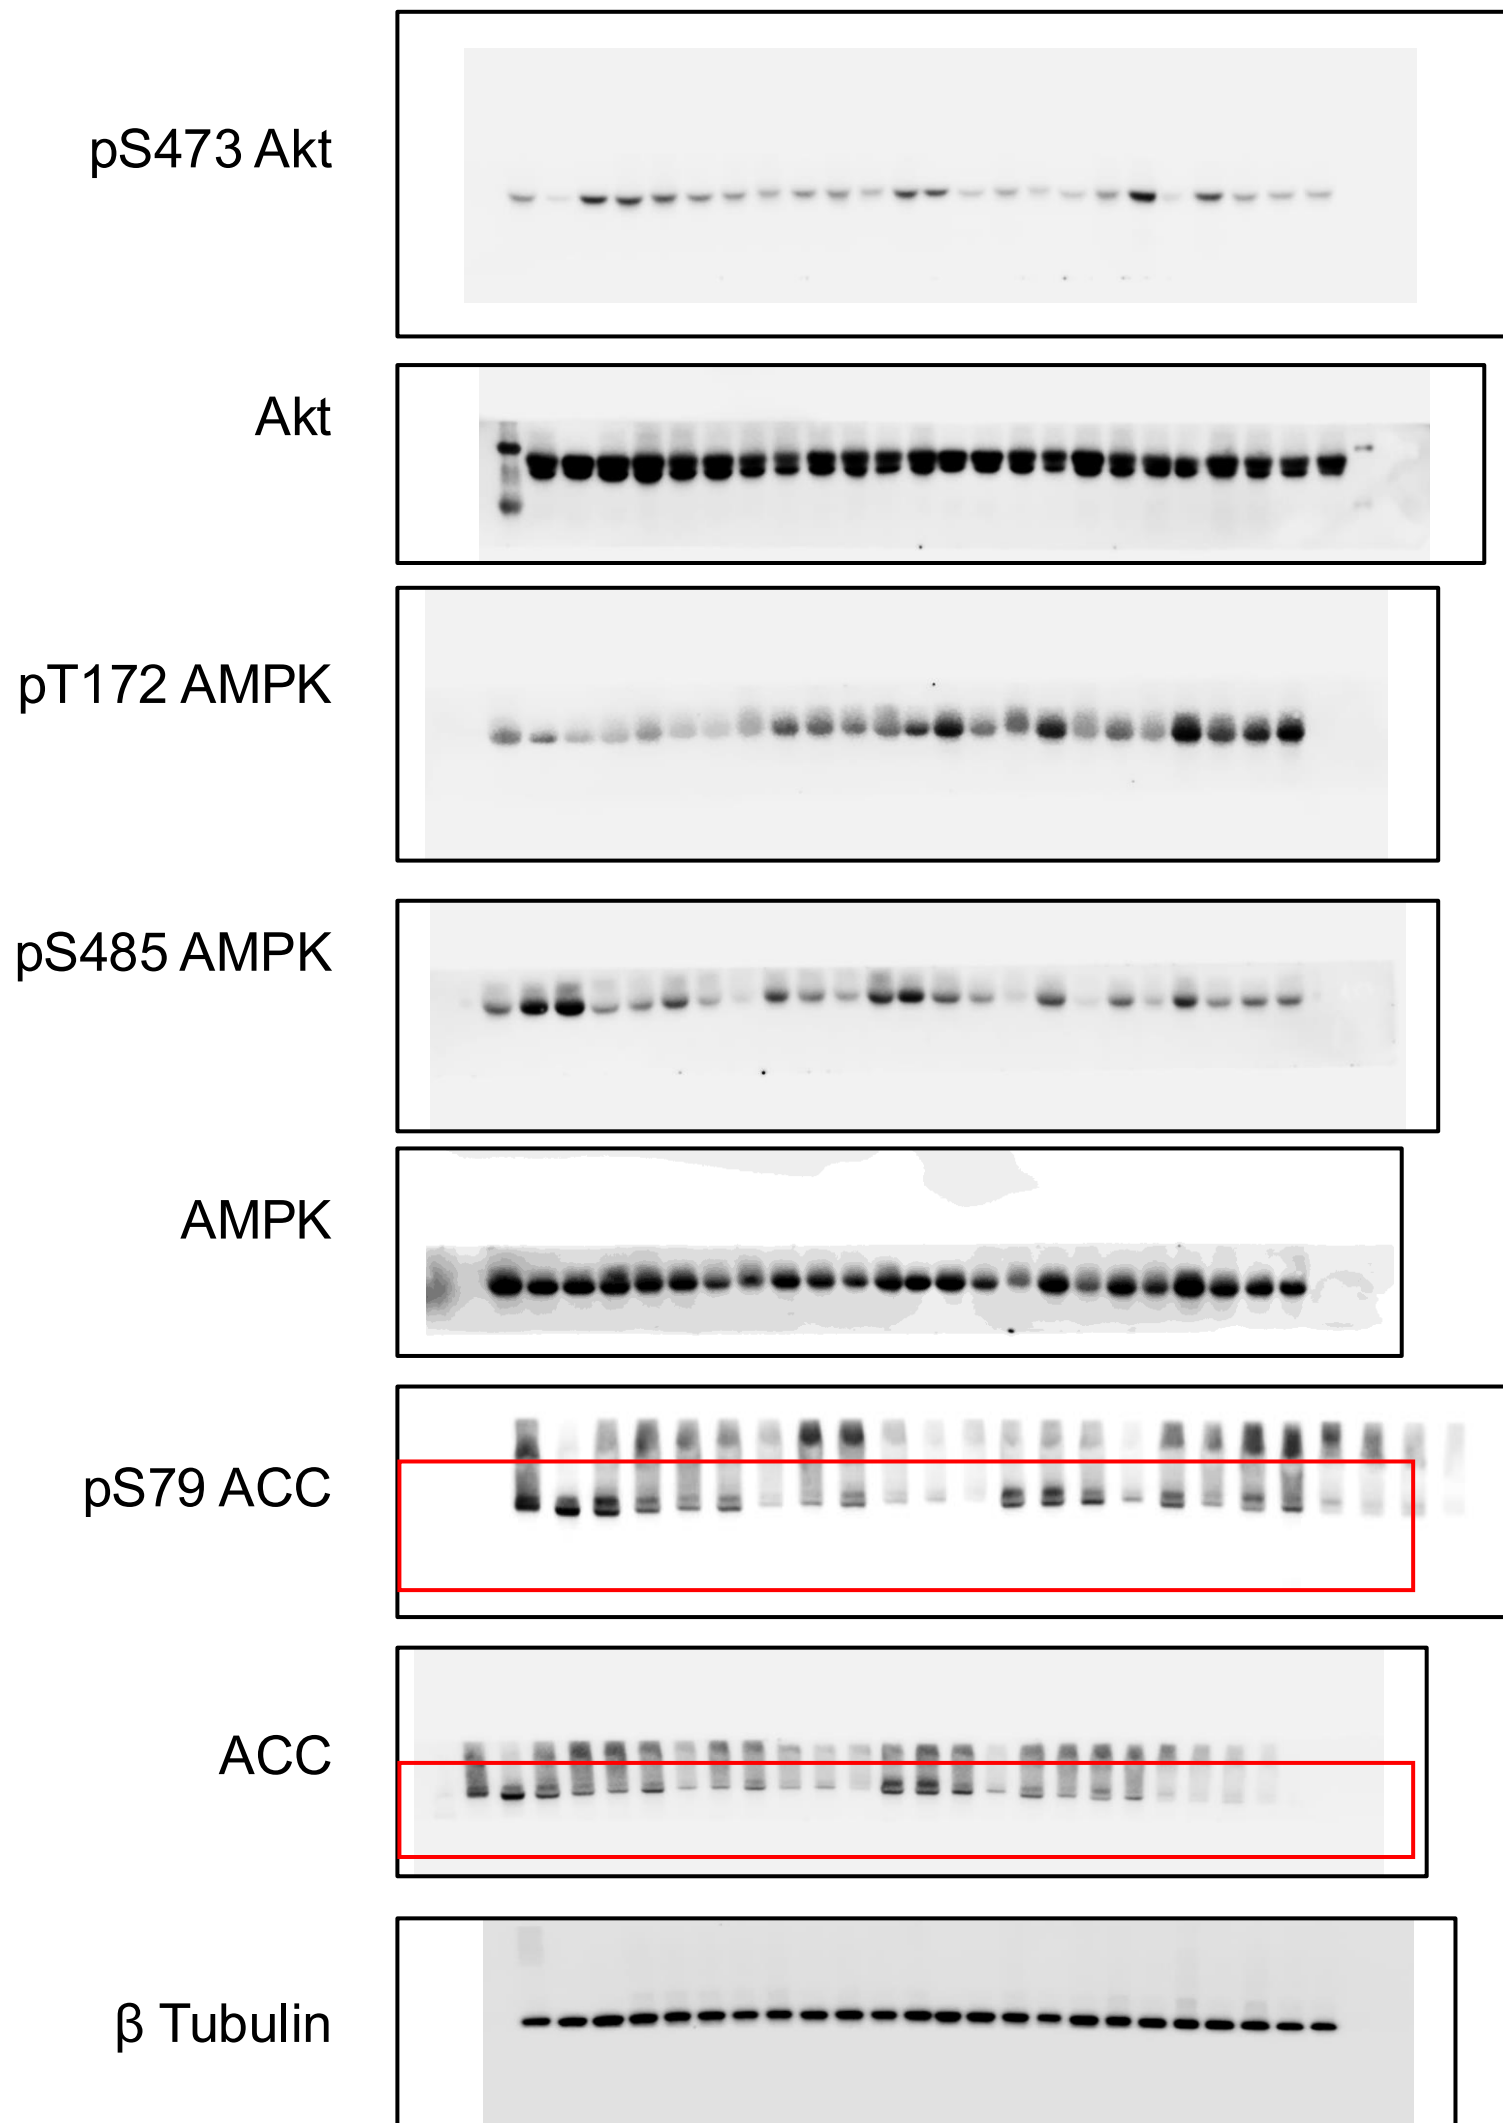

Figure 8H

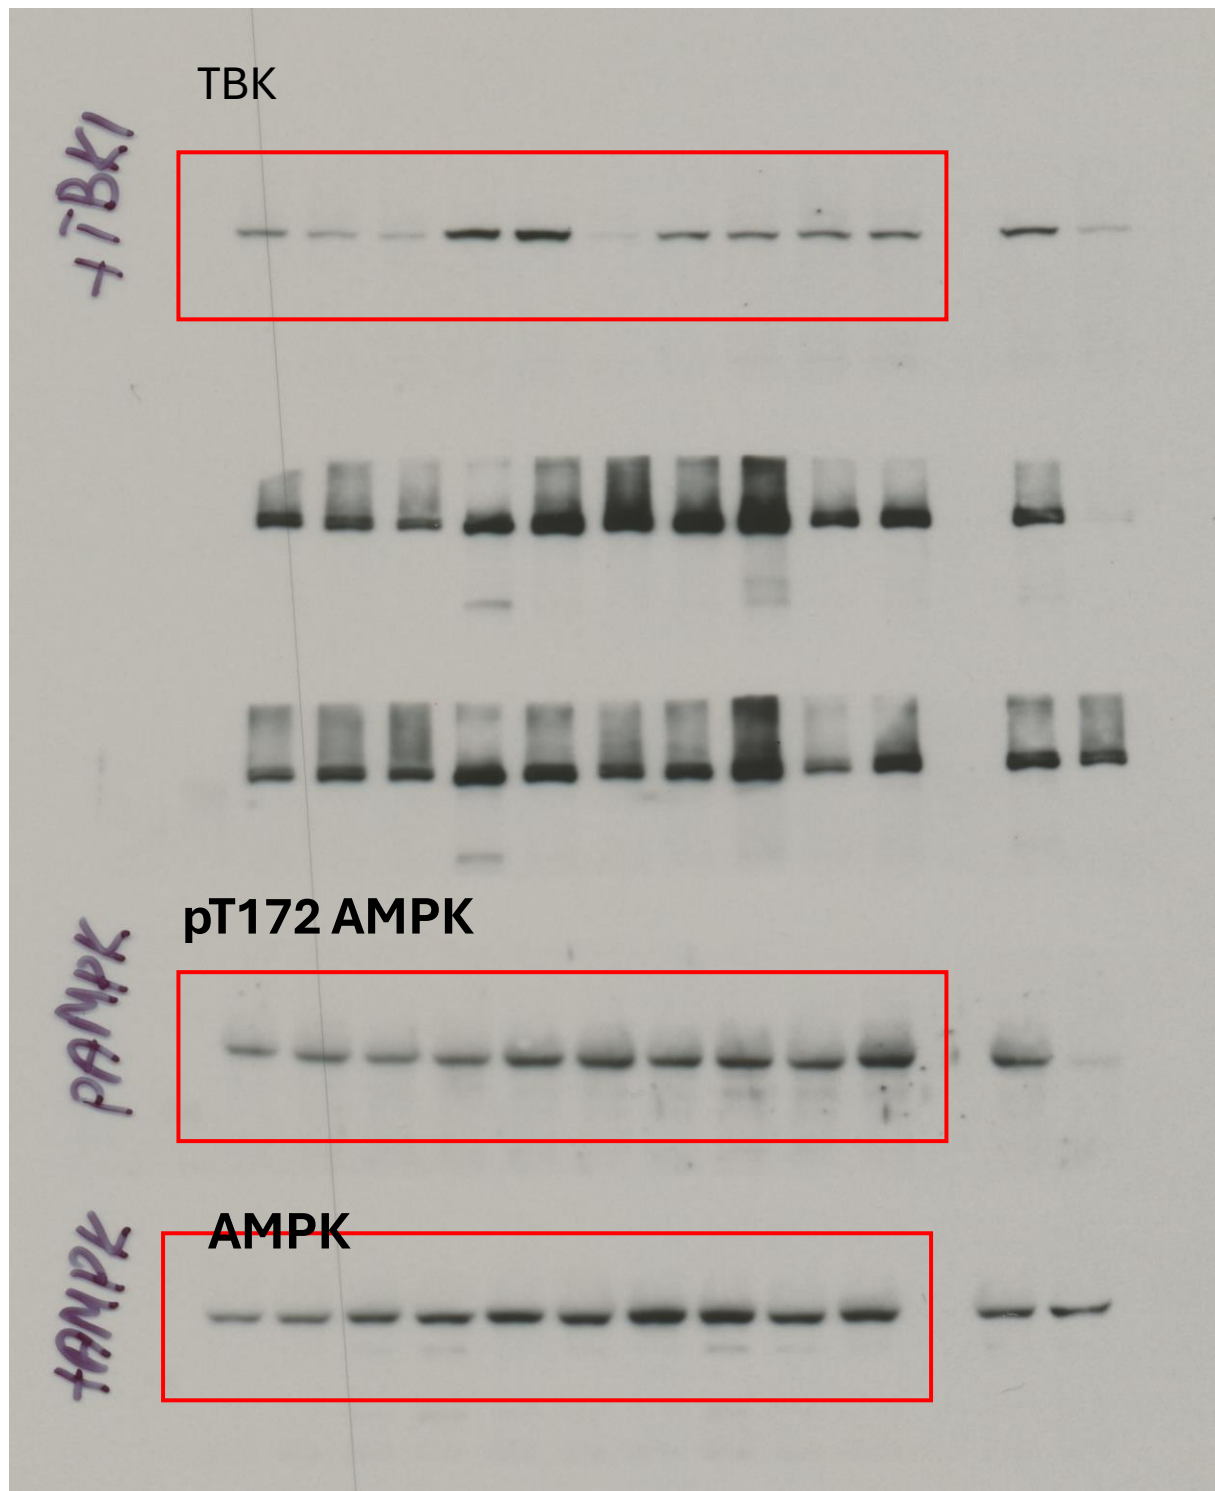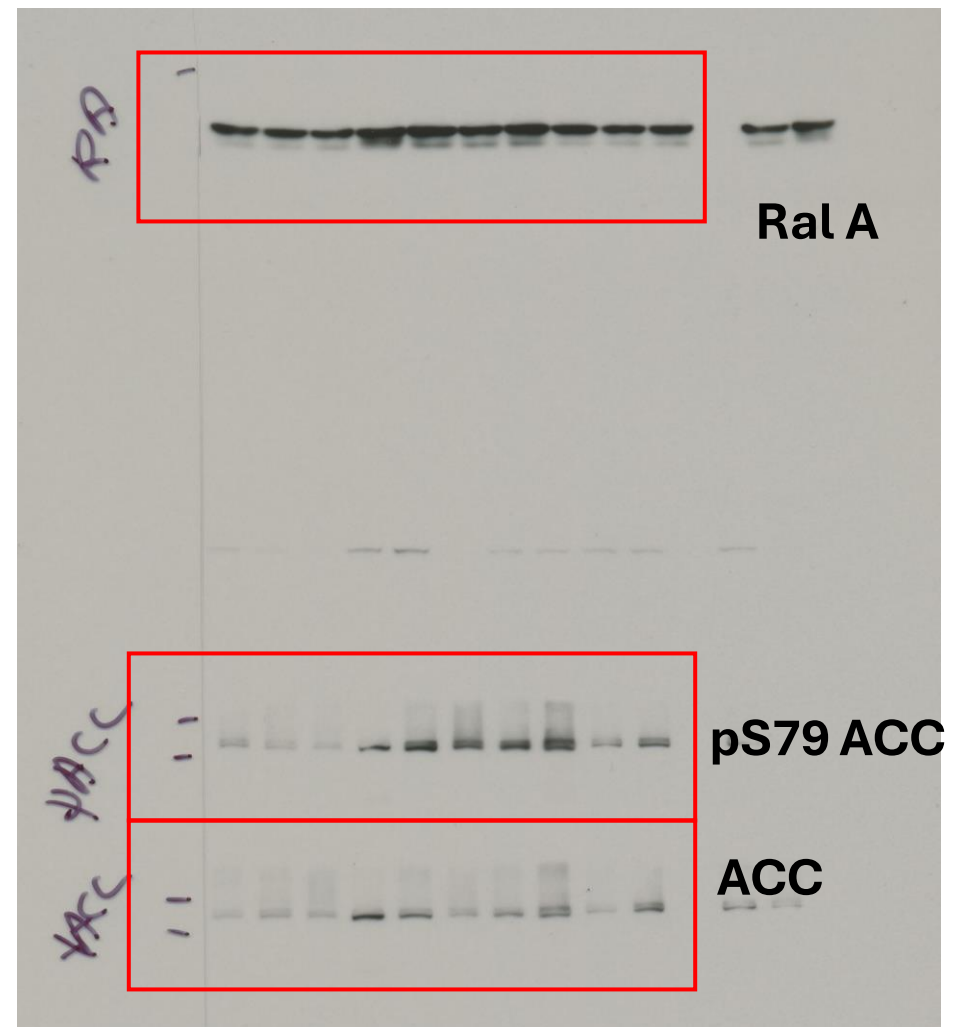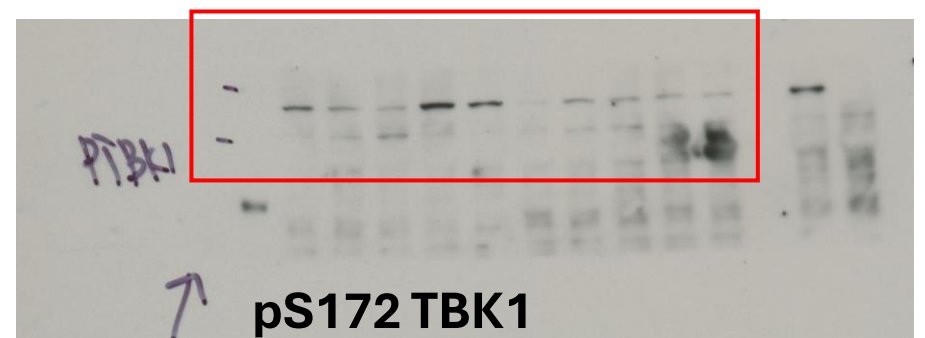

Figure 8J

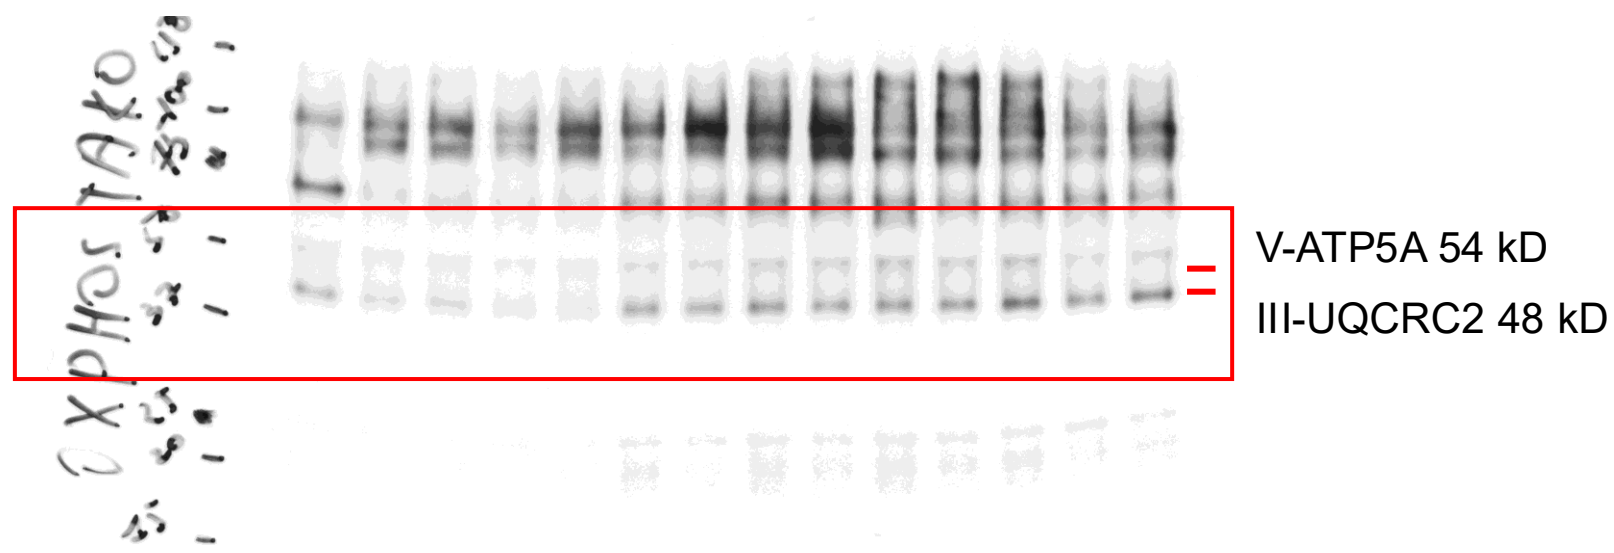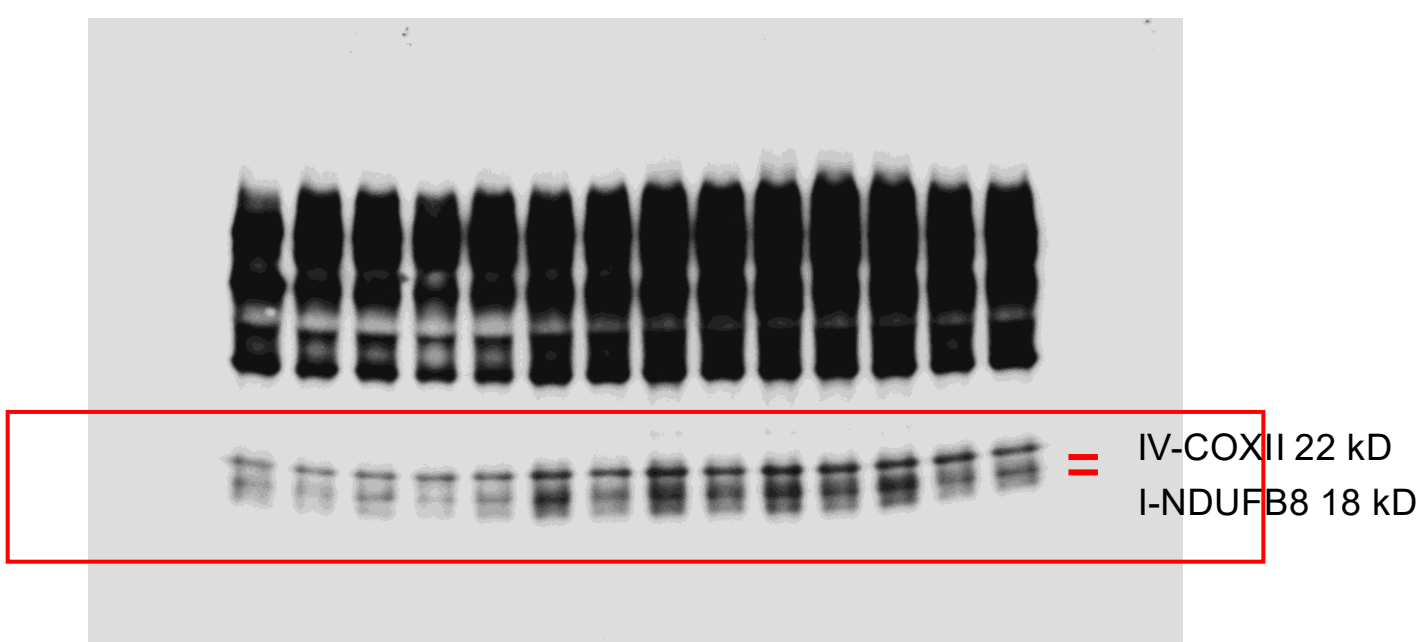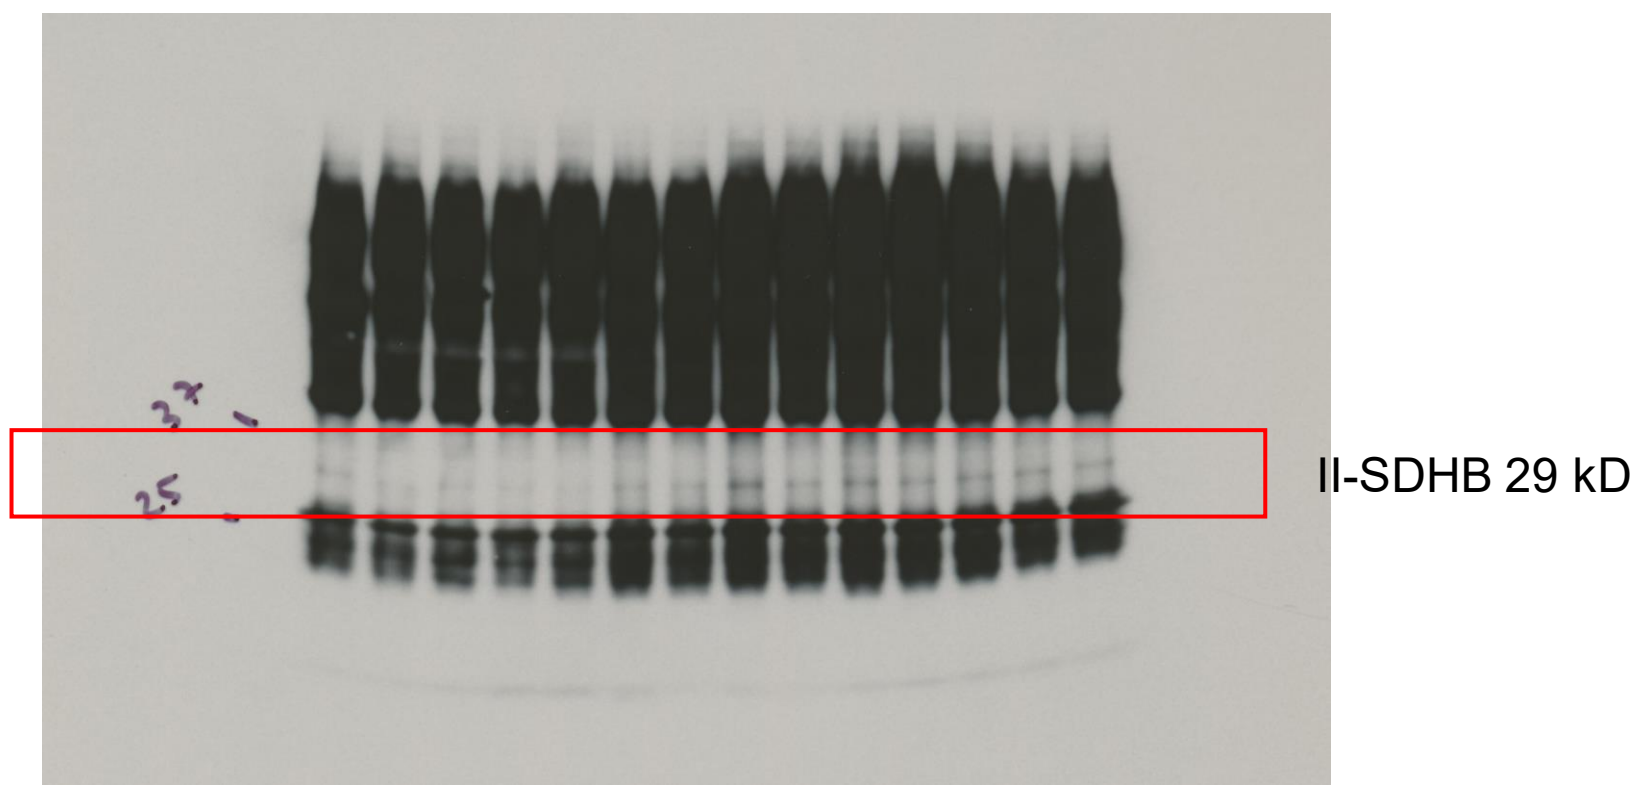

**Figure 11D**

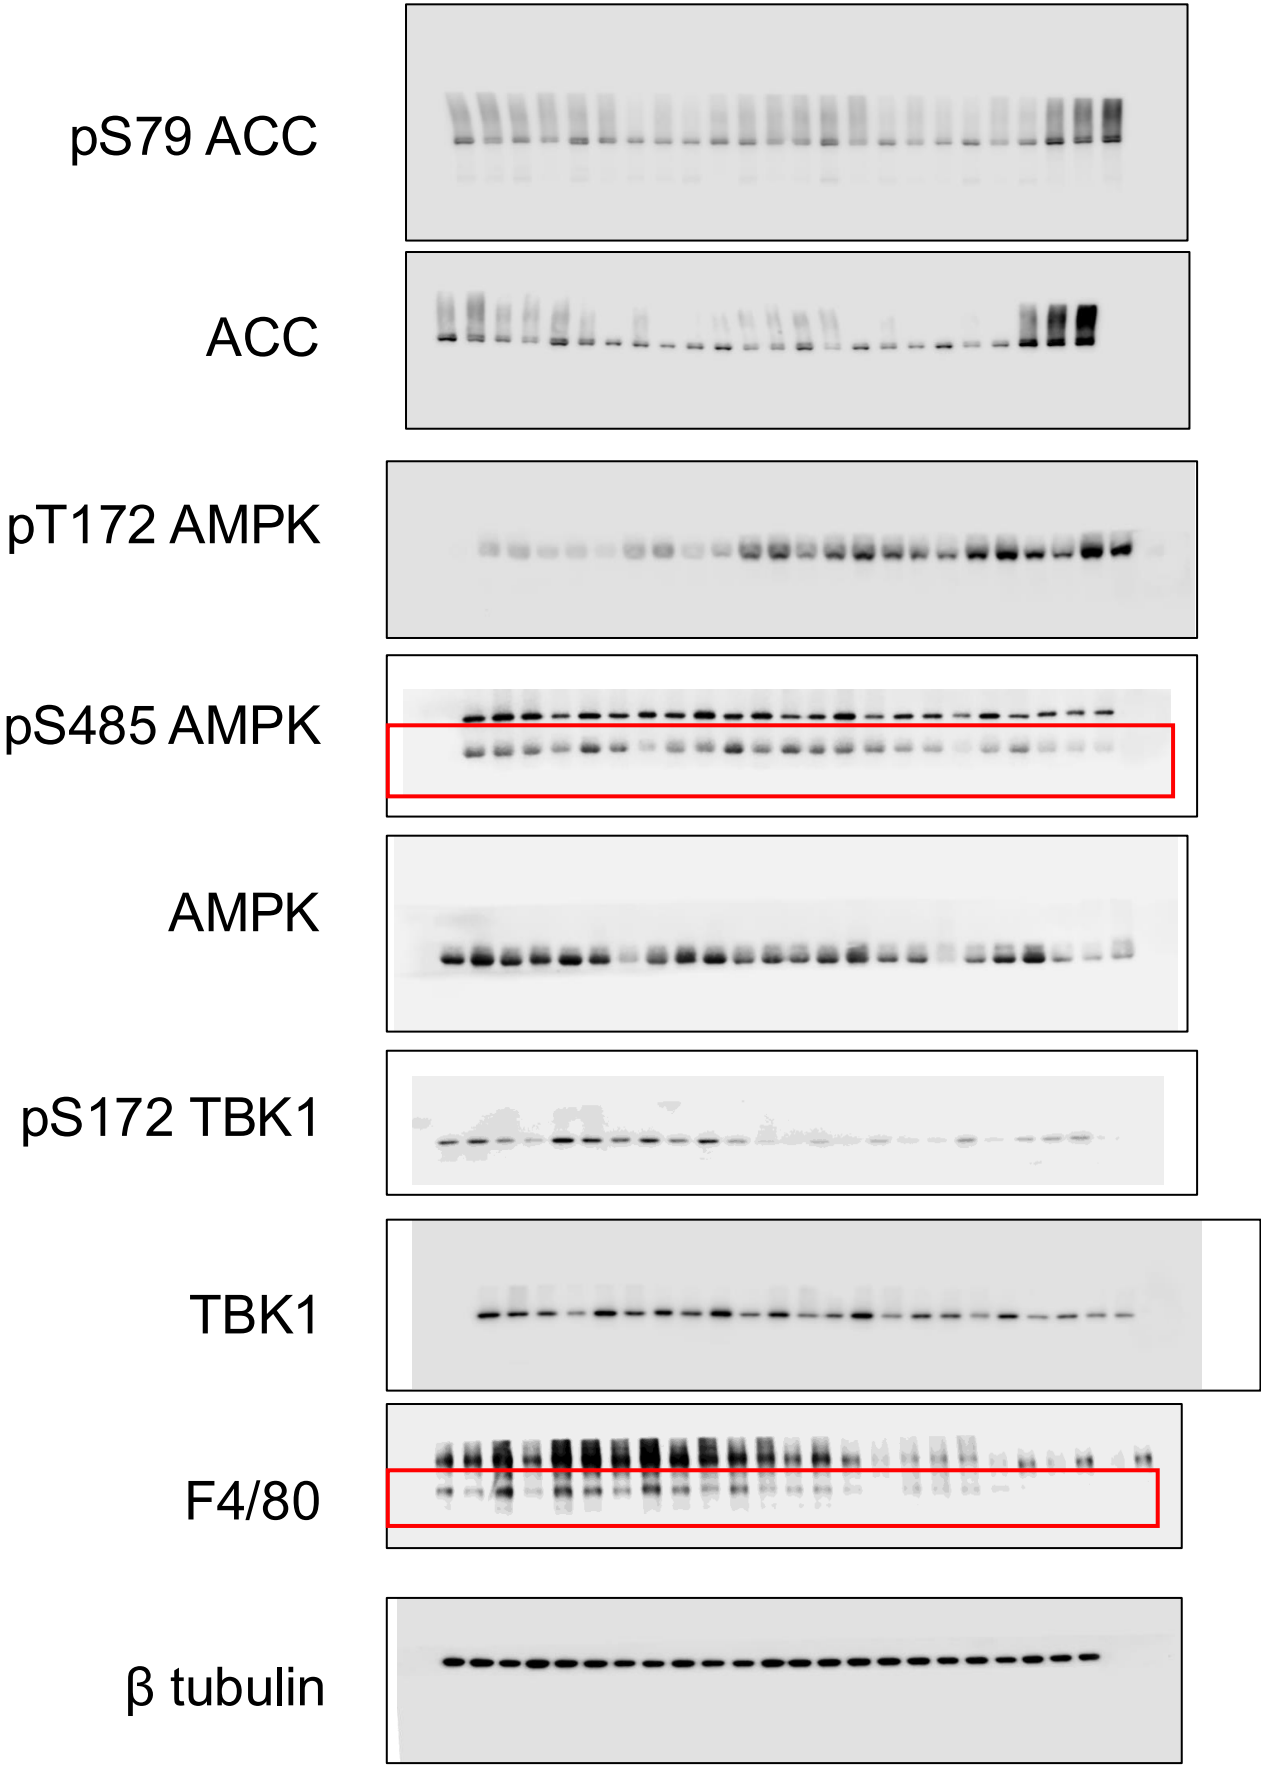

**Figure 12 A**

pY1150/1151 IR $\beta$

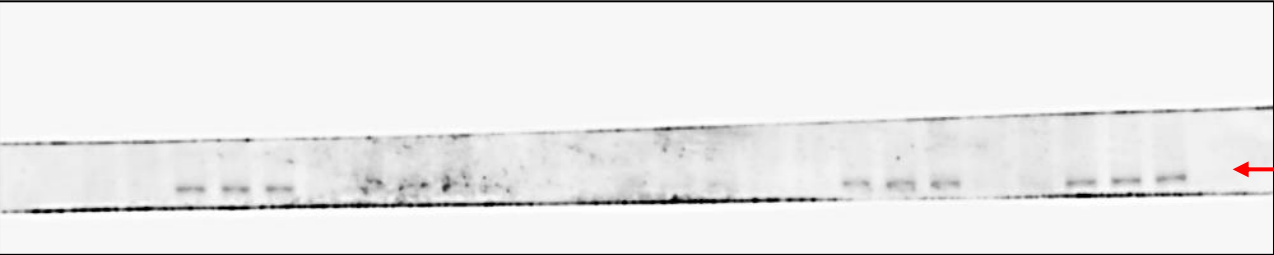

IR $\beta$

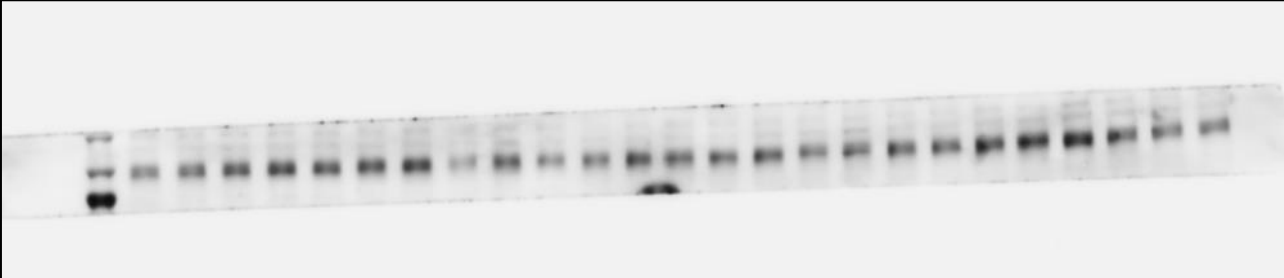

pS473 Akt

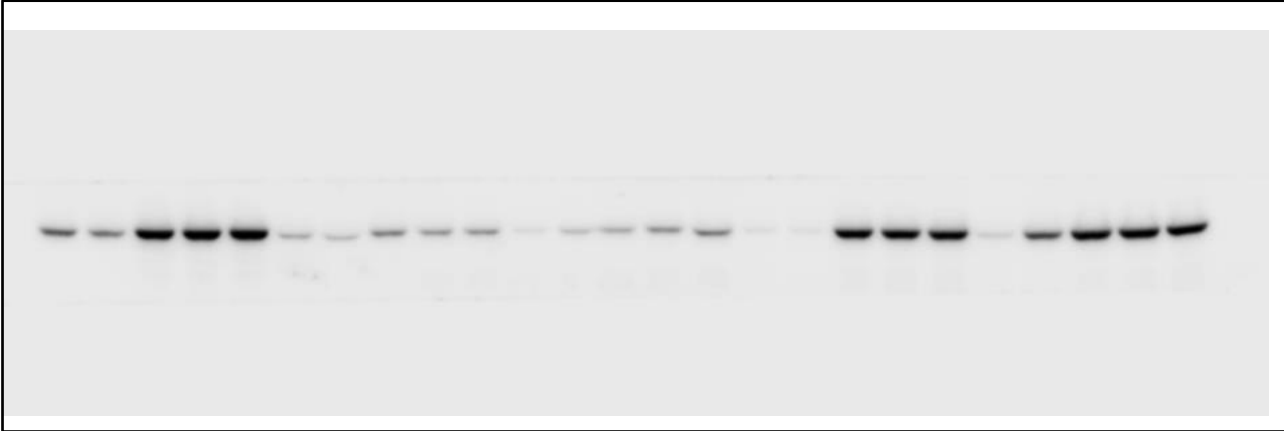

Akt

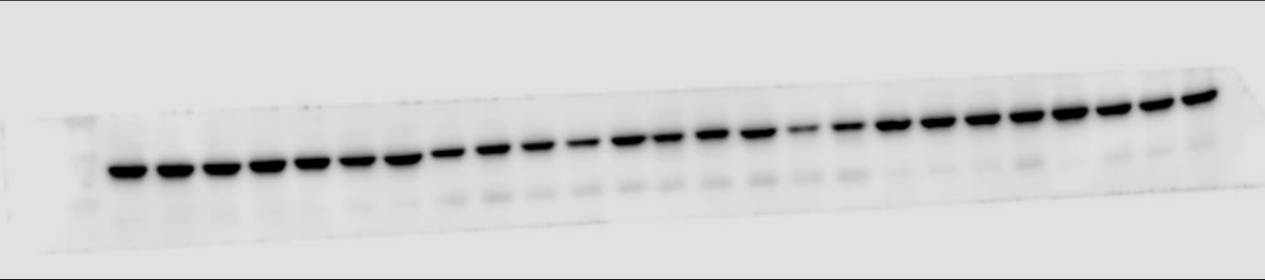

$\beta$  Tubulin

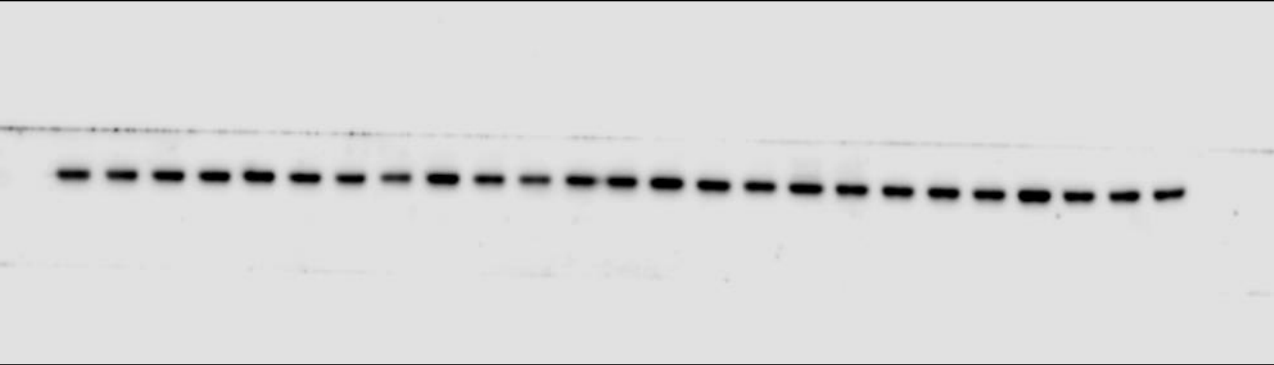

**Figure 12C**

pS79 ACC

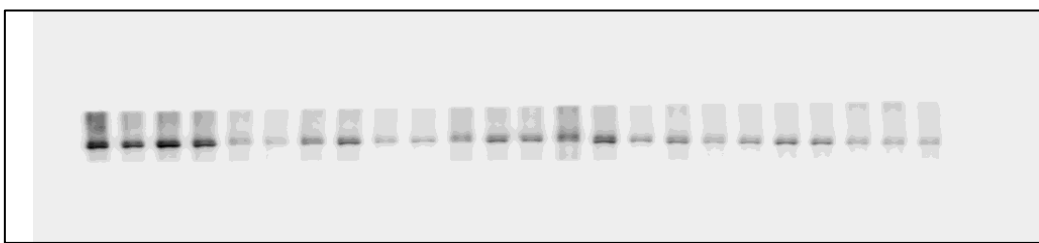

ACC

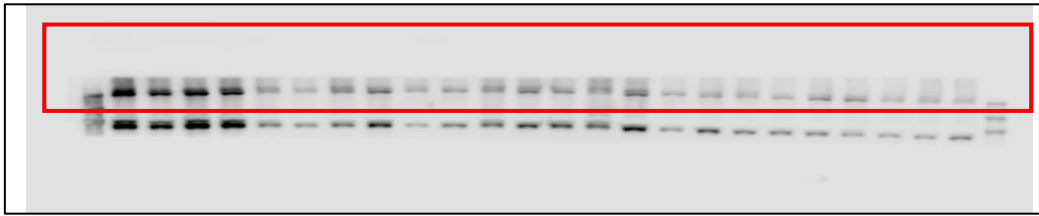

pT172 AMPK

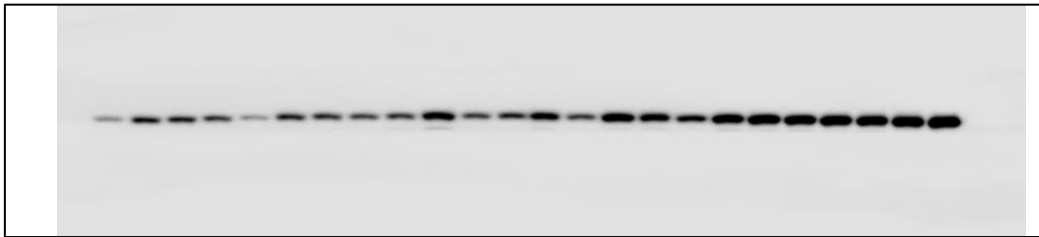

pS485 AMPK

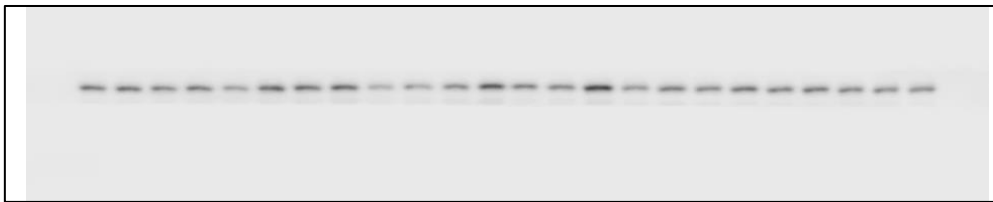

AMPK

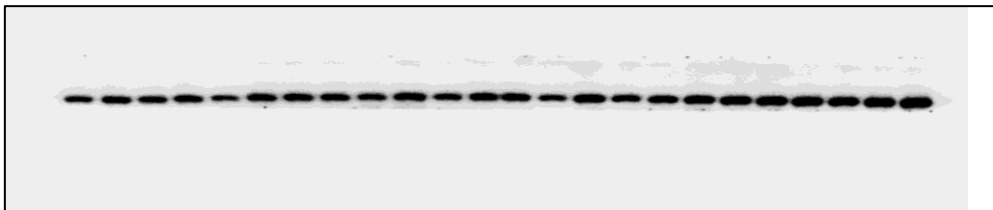

pS172 TBK1

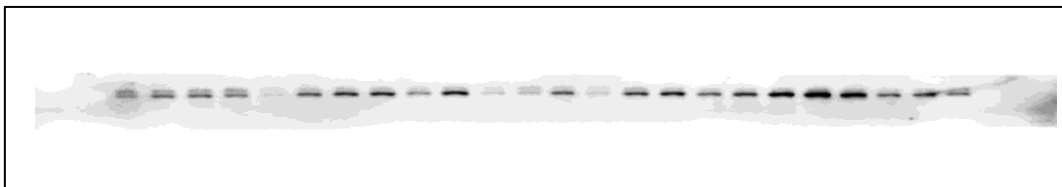

TBK1

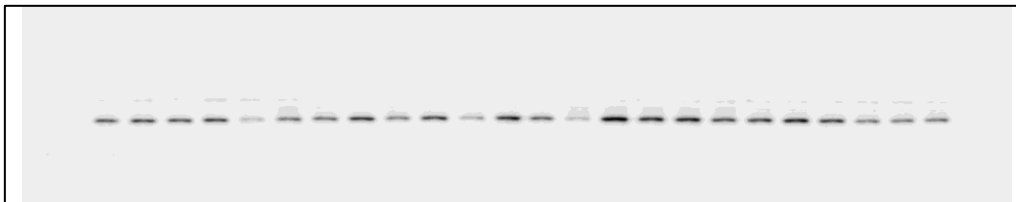

F4/80

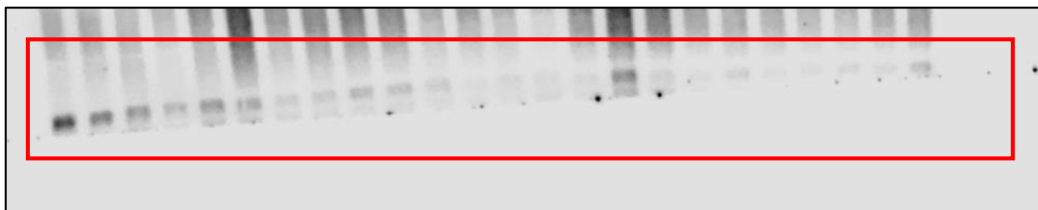

$\beta$  tubulin

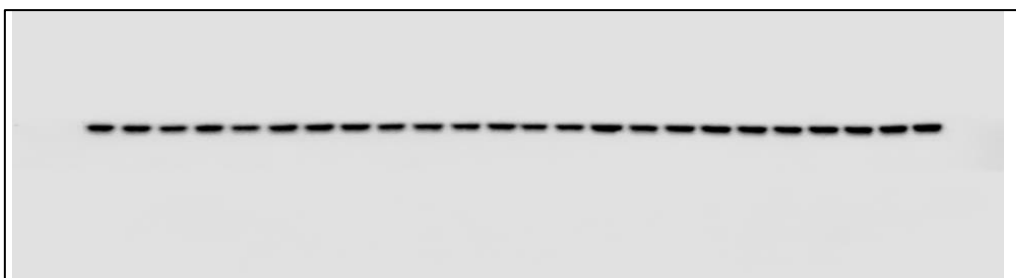

# SUPPLEMENT FIG 1C

pS79 ACC

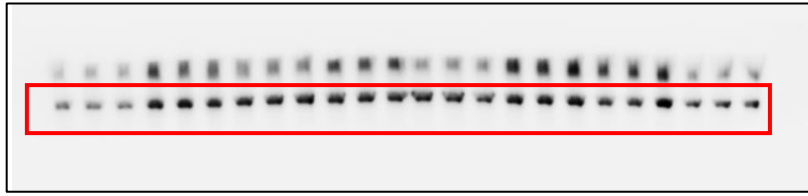

ACC

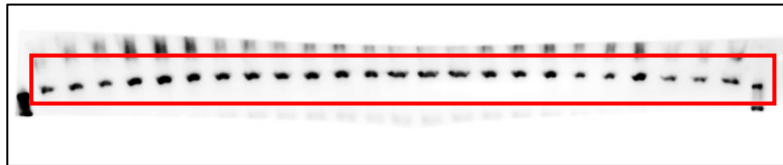

pS555 ULK1

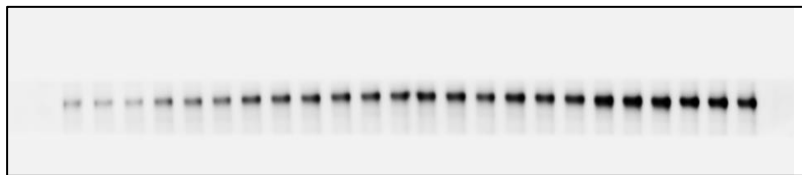

ULK1

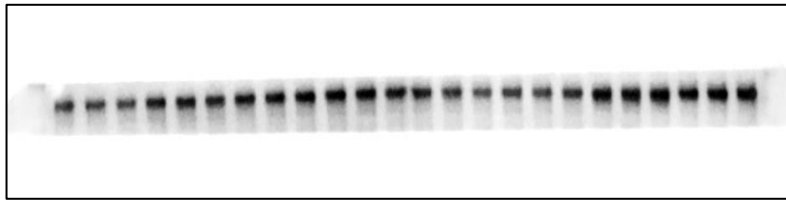

pS792 Raptor

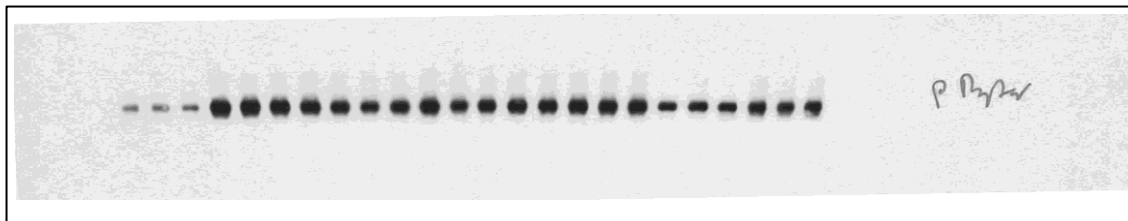

Raptor

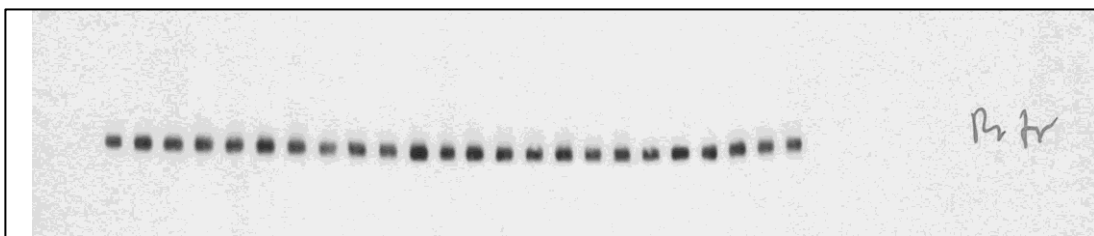

pT172 AMPK

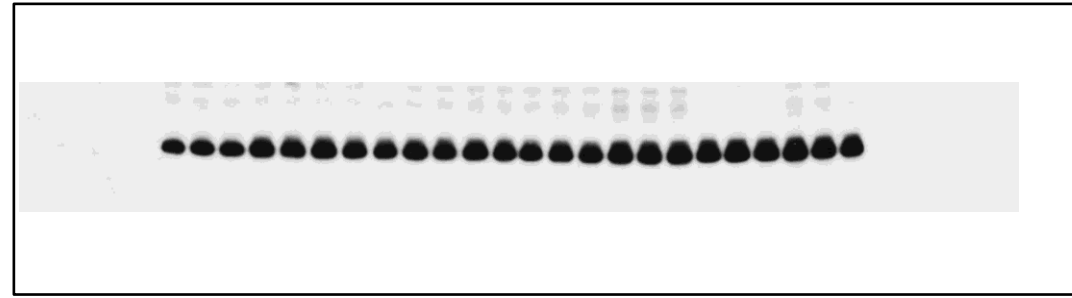

AMPK

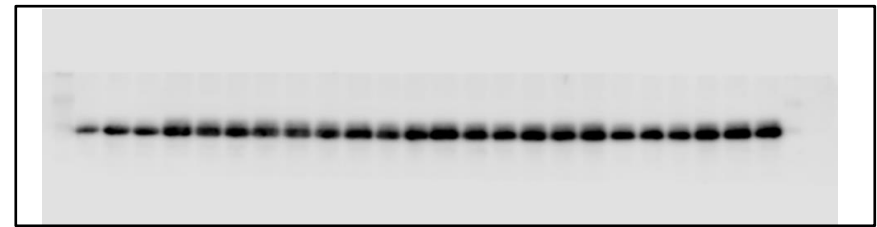

pS172 TBK1

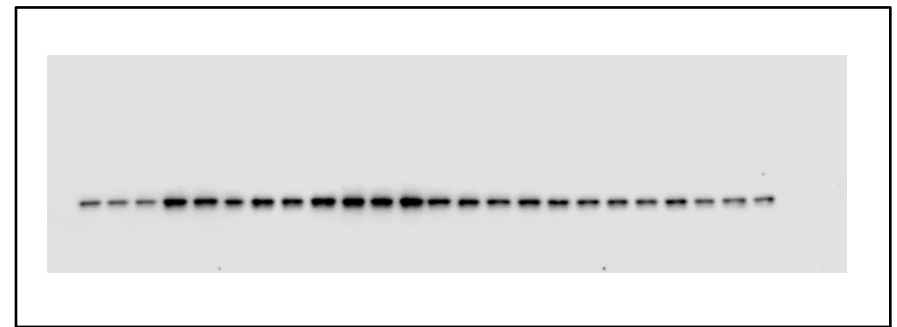

TBK1

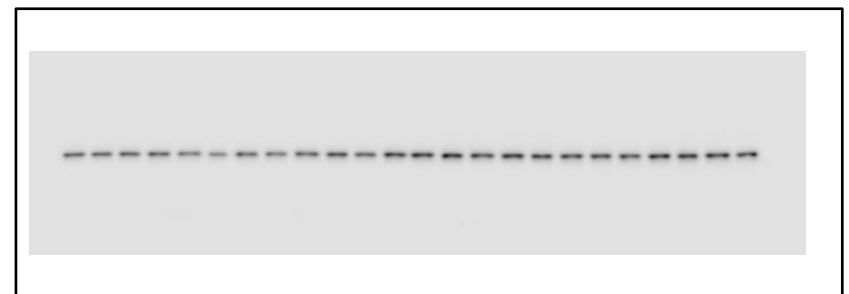

Ra1A

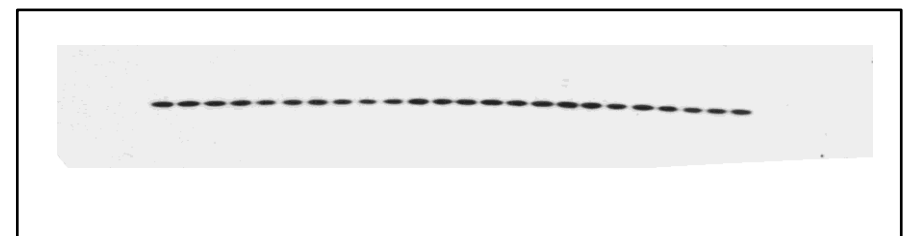

# SUPPLEMENT FIG 1E

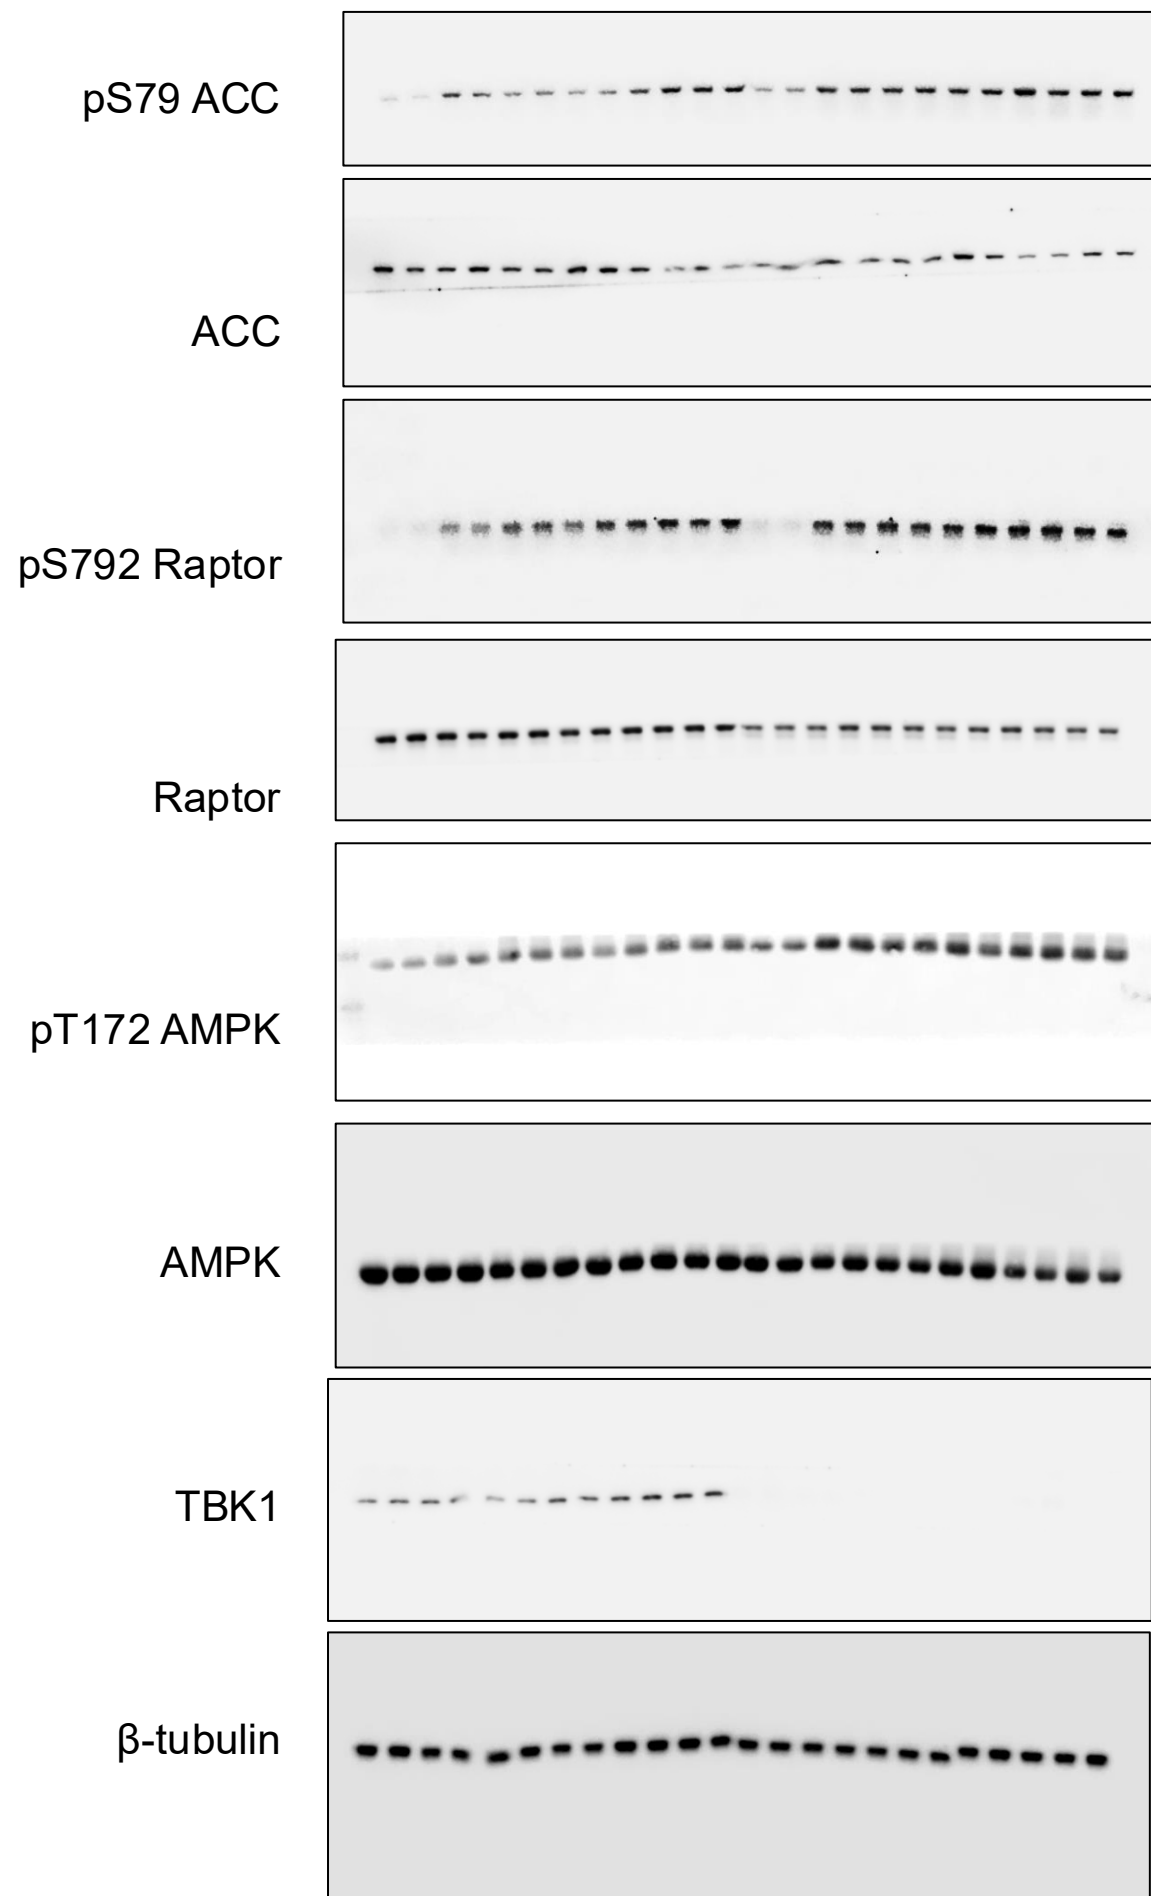

# supplemental fig 3F

NRF1

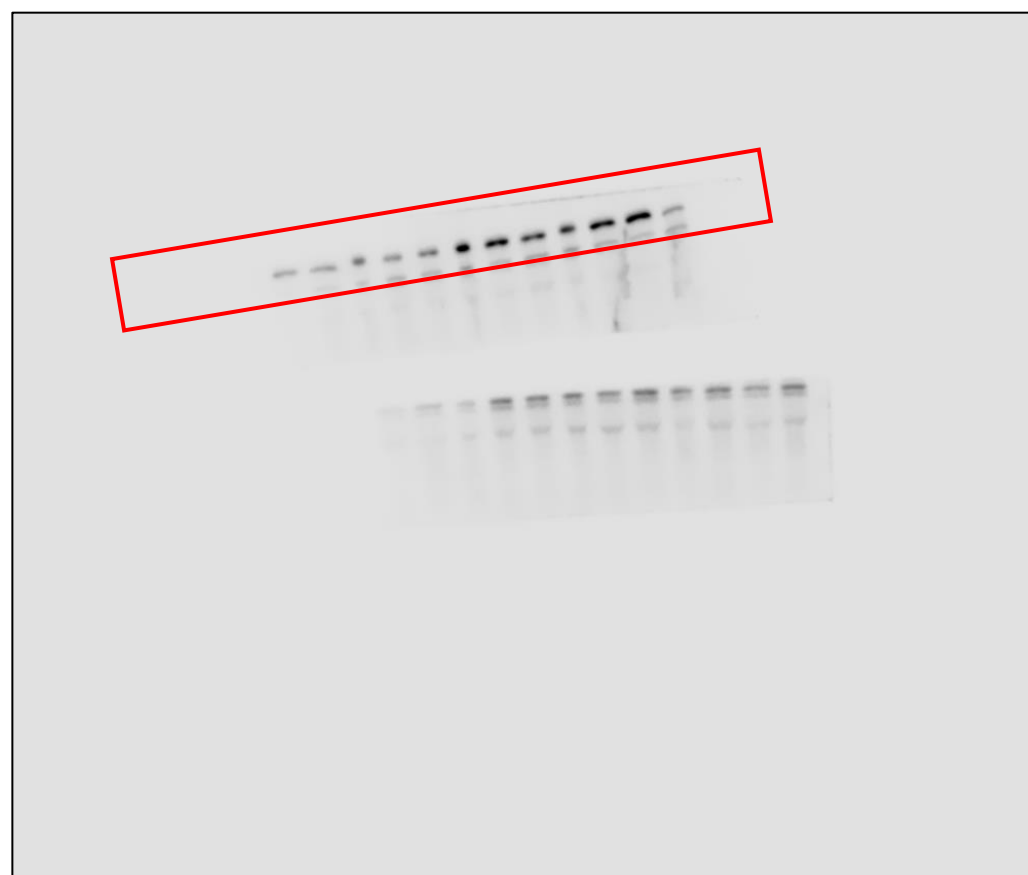

HSP90

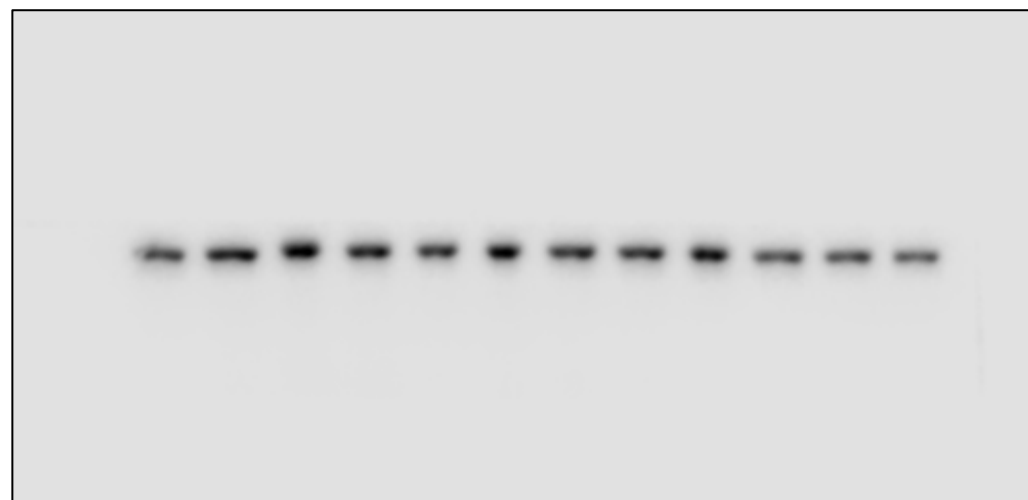

# SUPPLEMENT FIG 2A

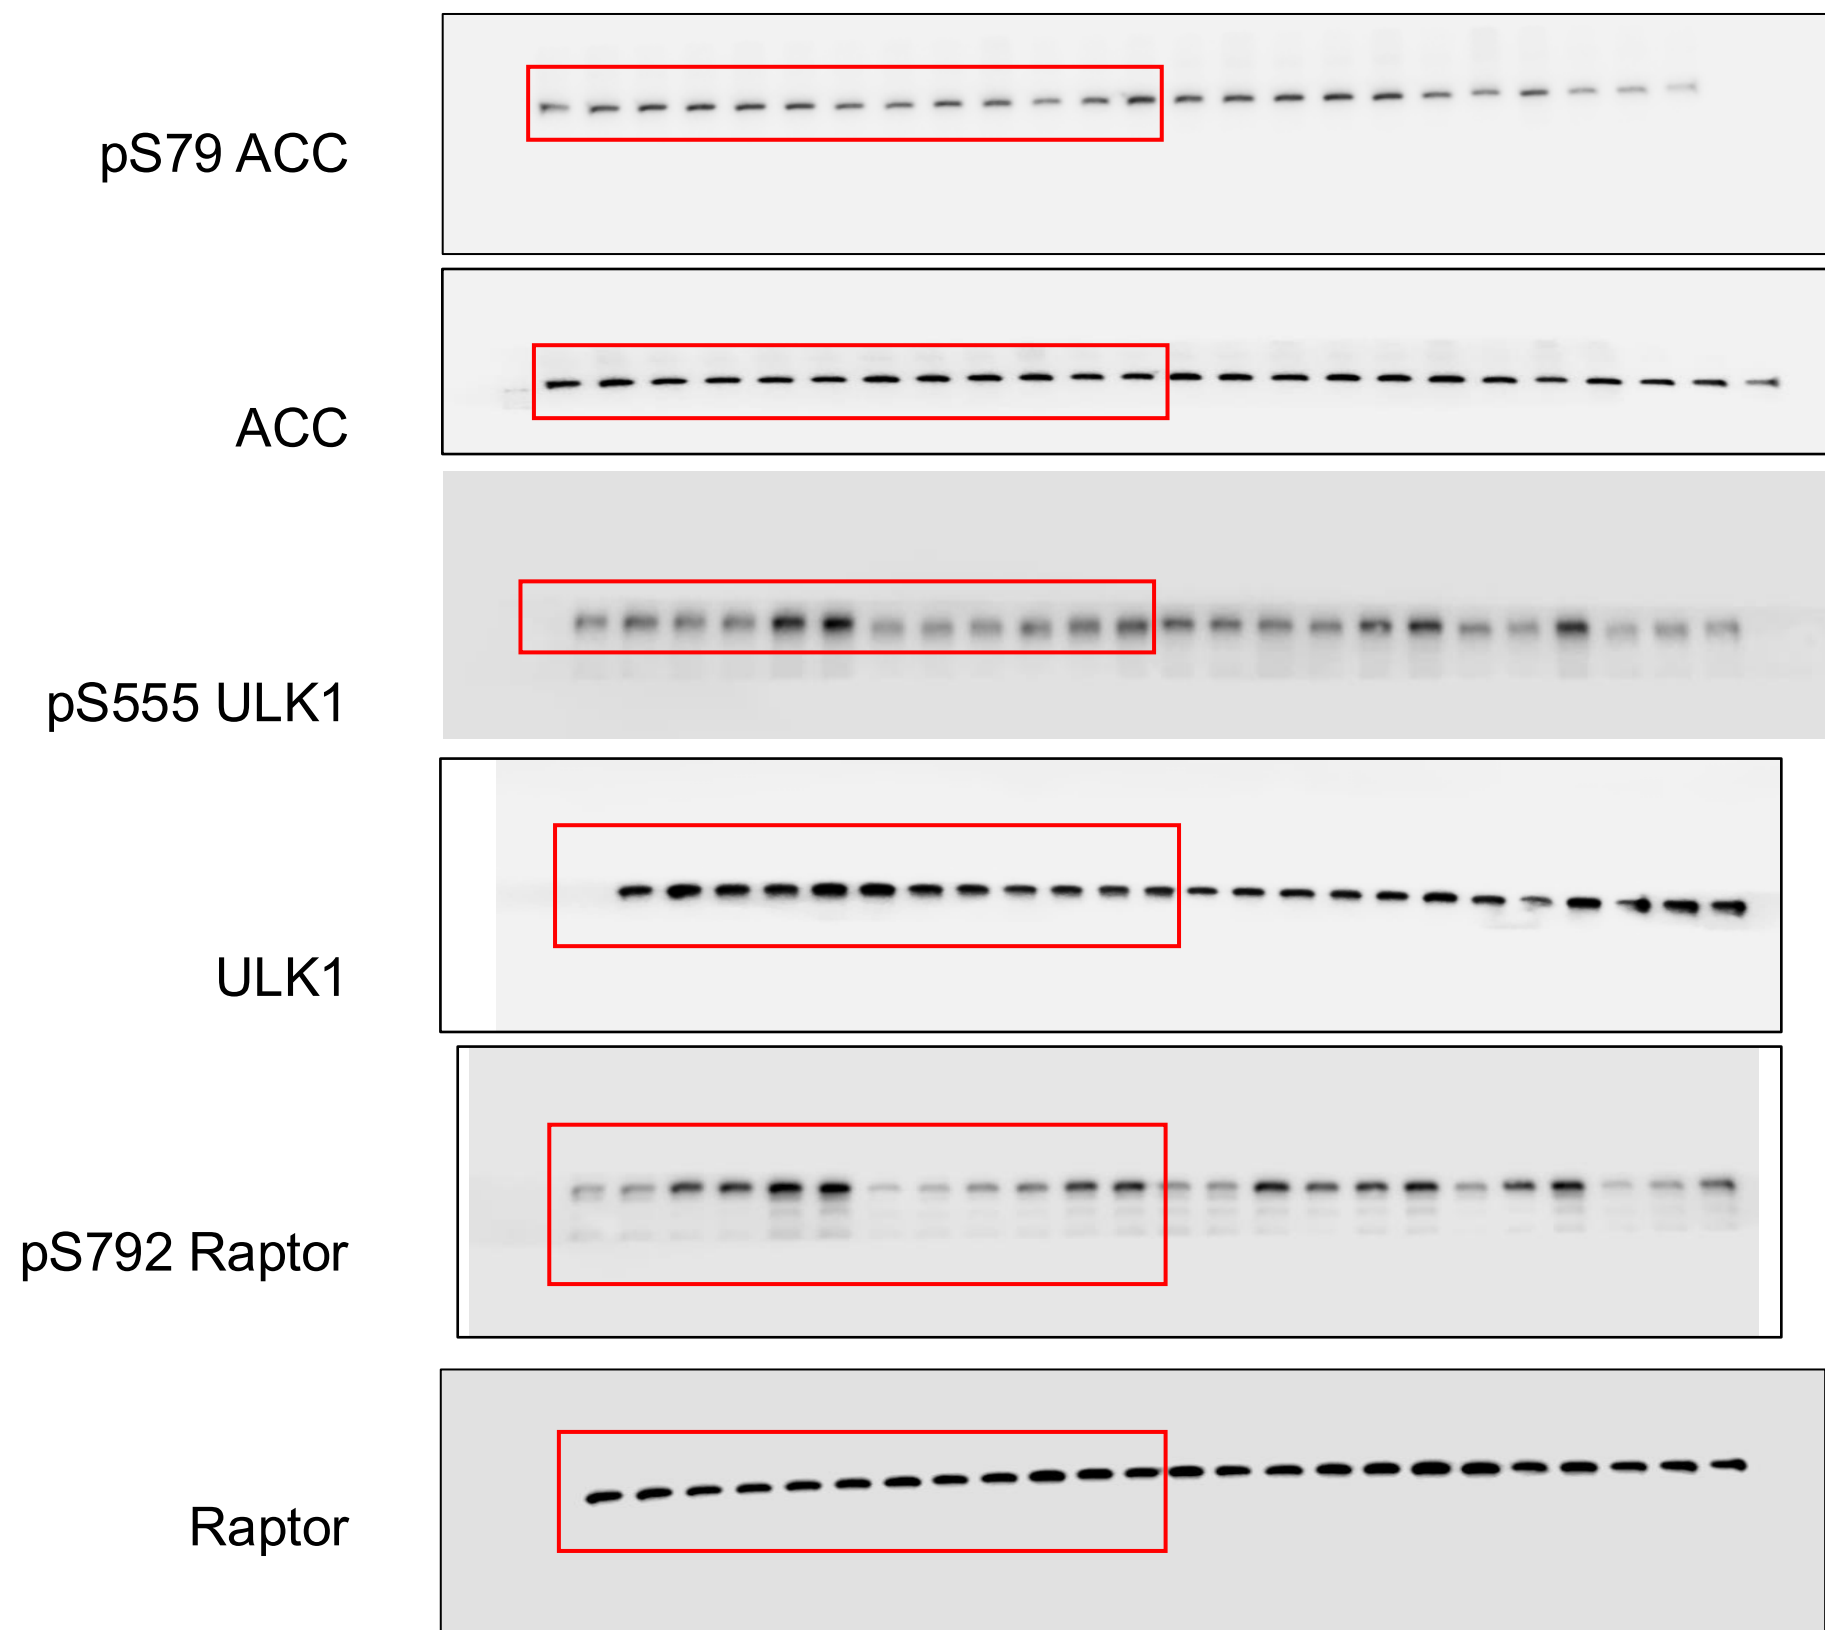

# SUPPLEMENT FIG 2A-2

pT172 AMPK

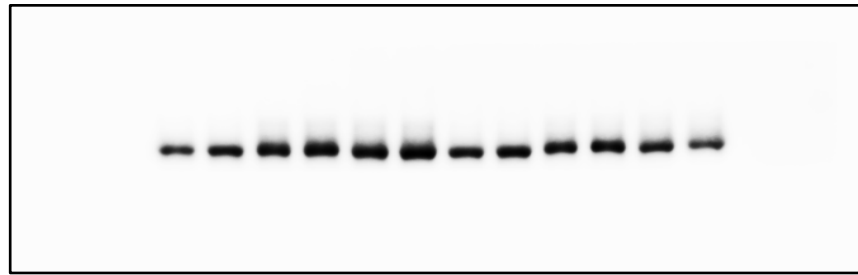

AMPK

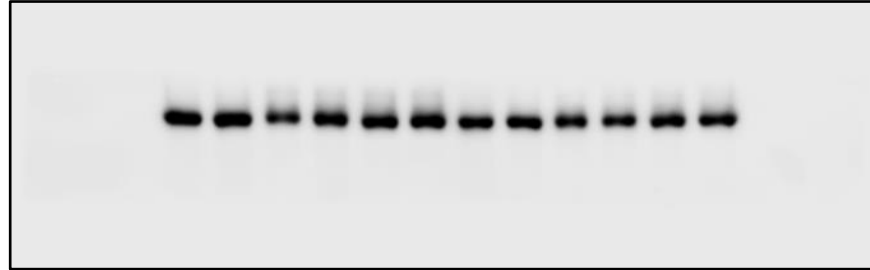

pS172 TBK1

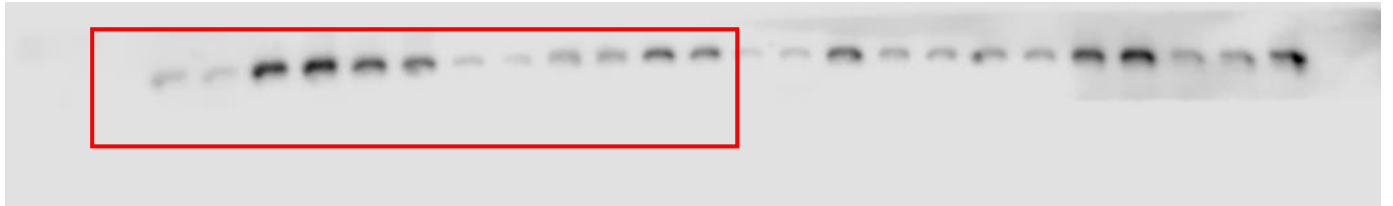

TBK1

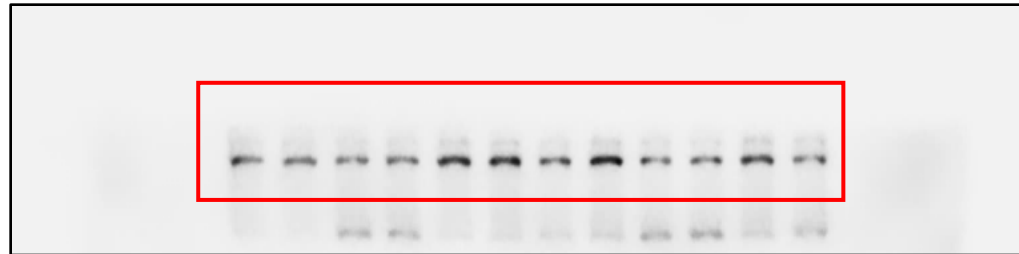

HSP90

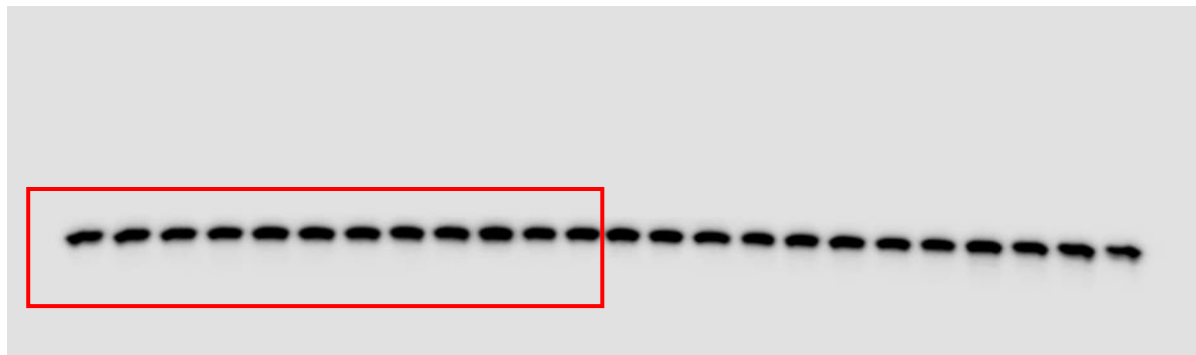

# Supplemental Fig 2D

AMPK

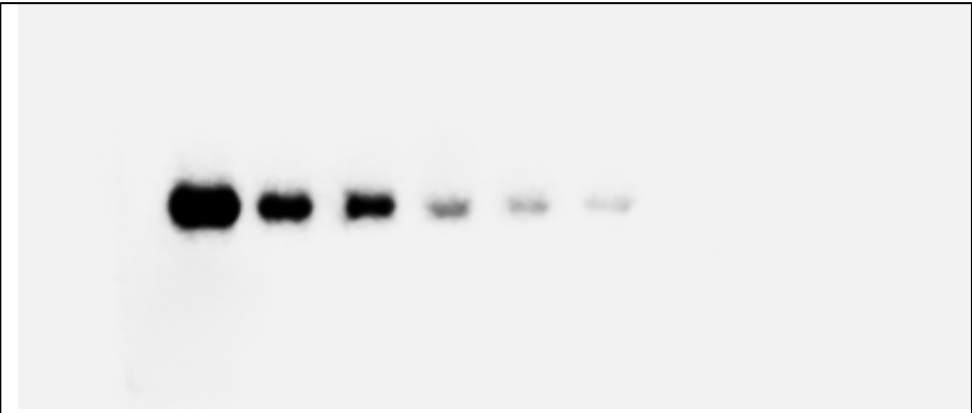

B tubulin

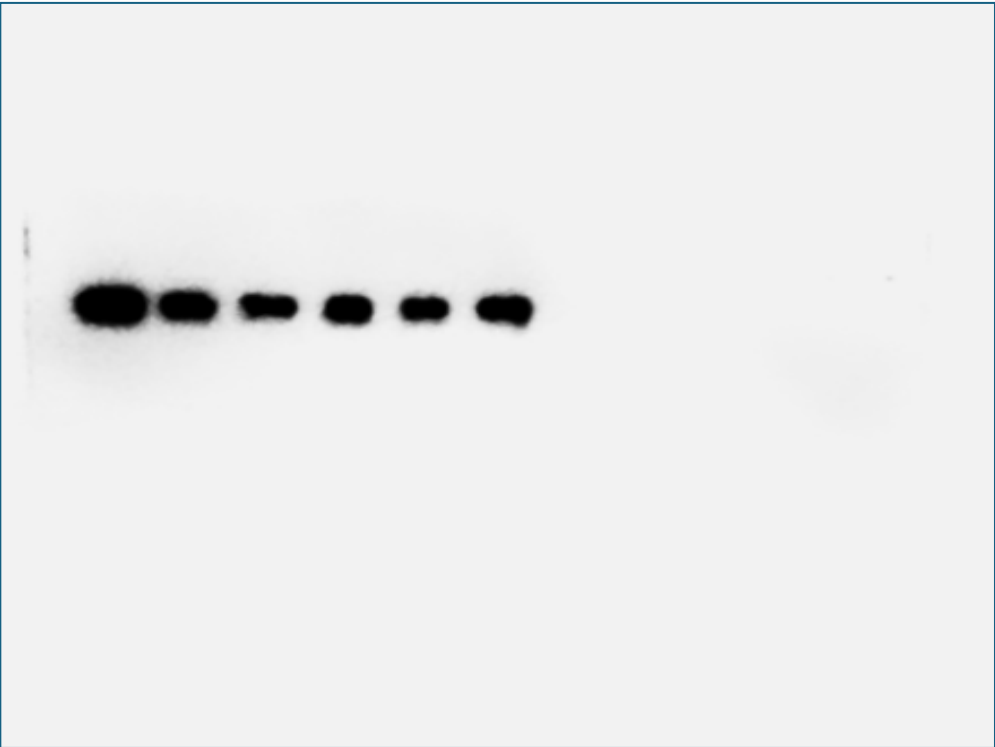

# Sup Fig 3H

pS79 ACC

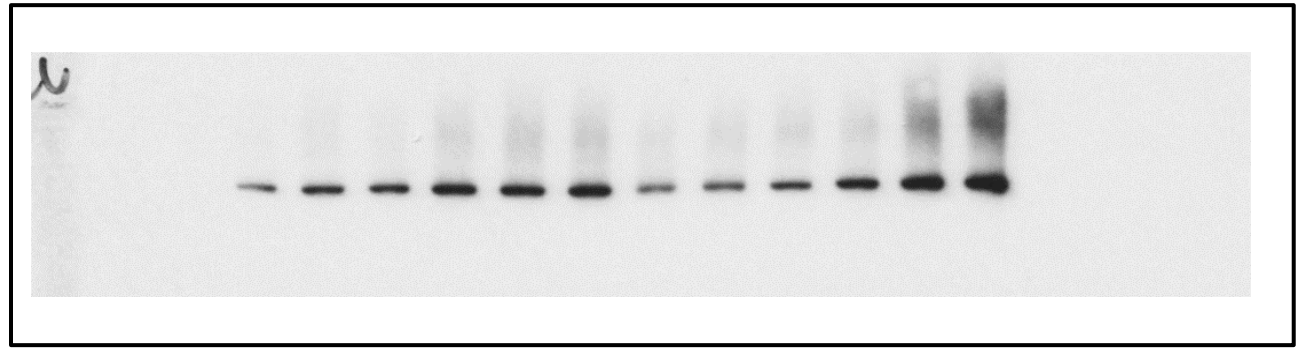

ACC

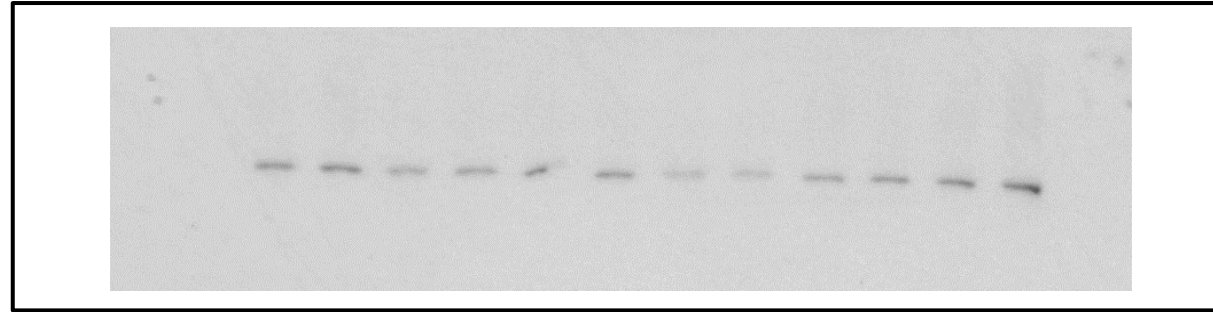

NRF1

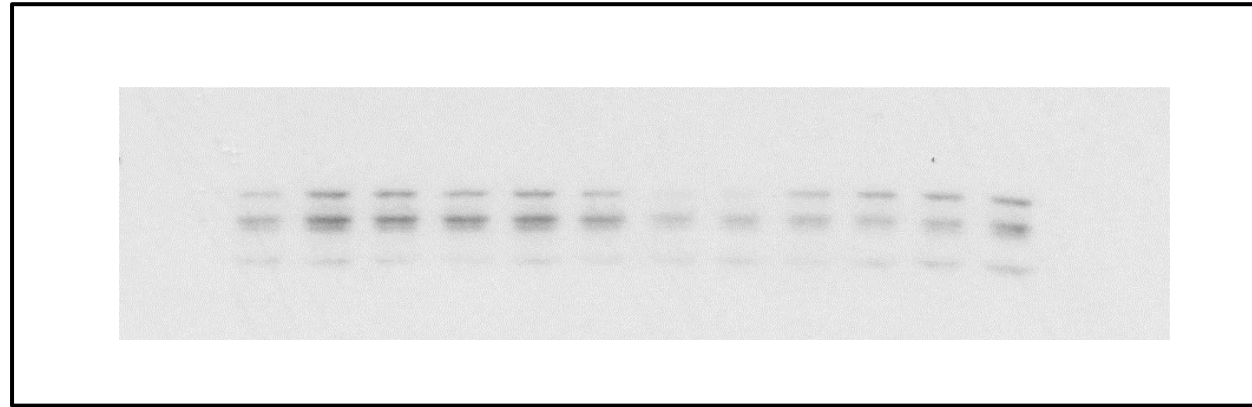

TBK

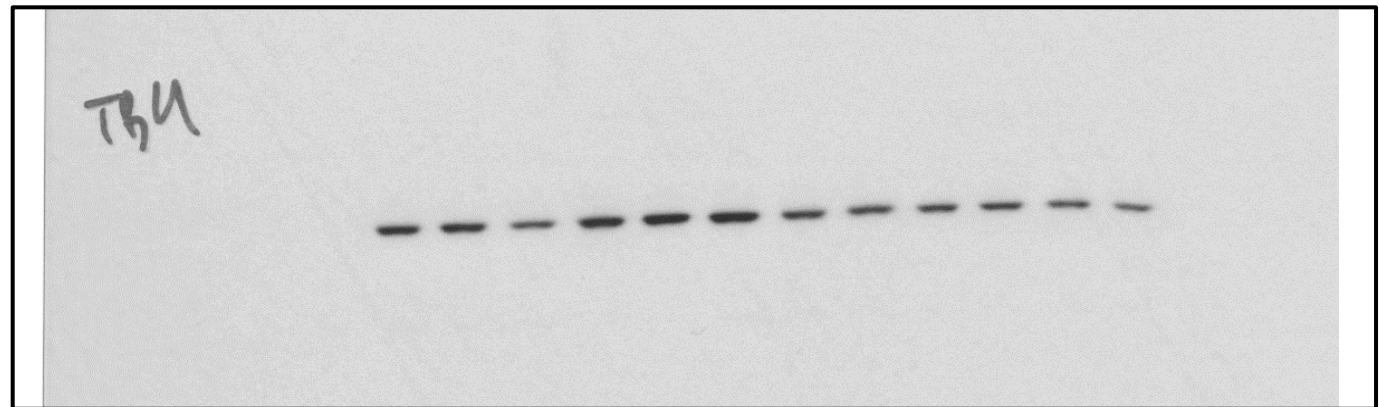

Ra1A

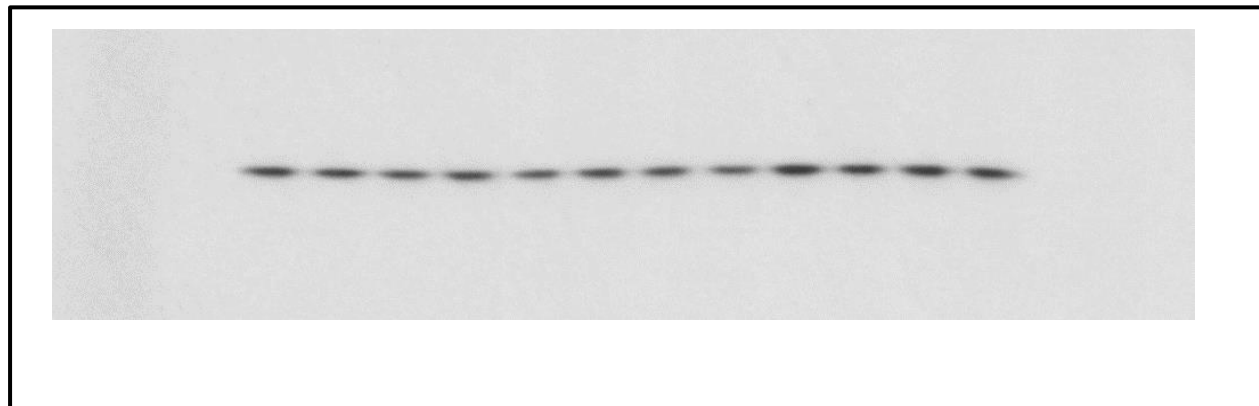

# Sup Fig 3J

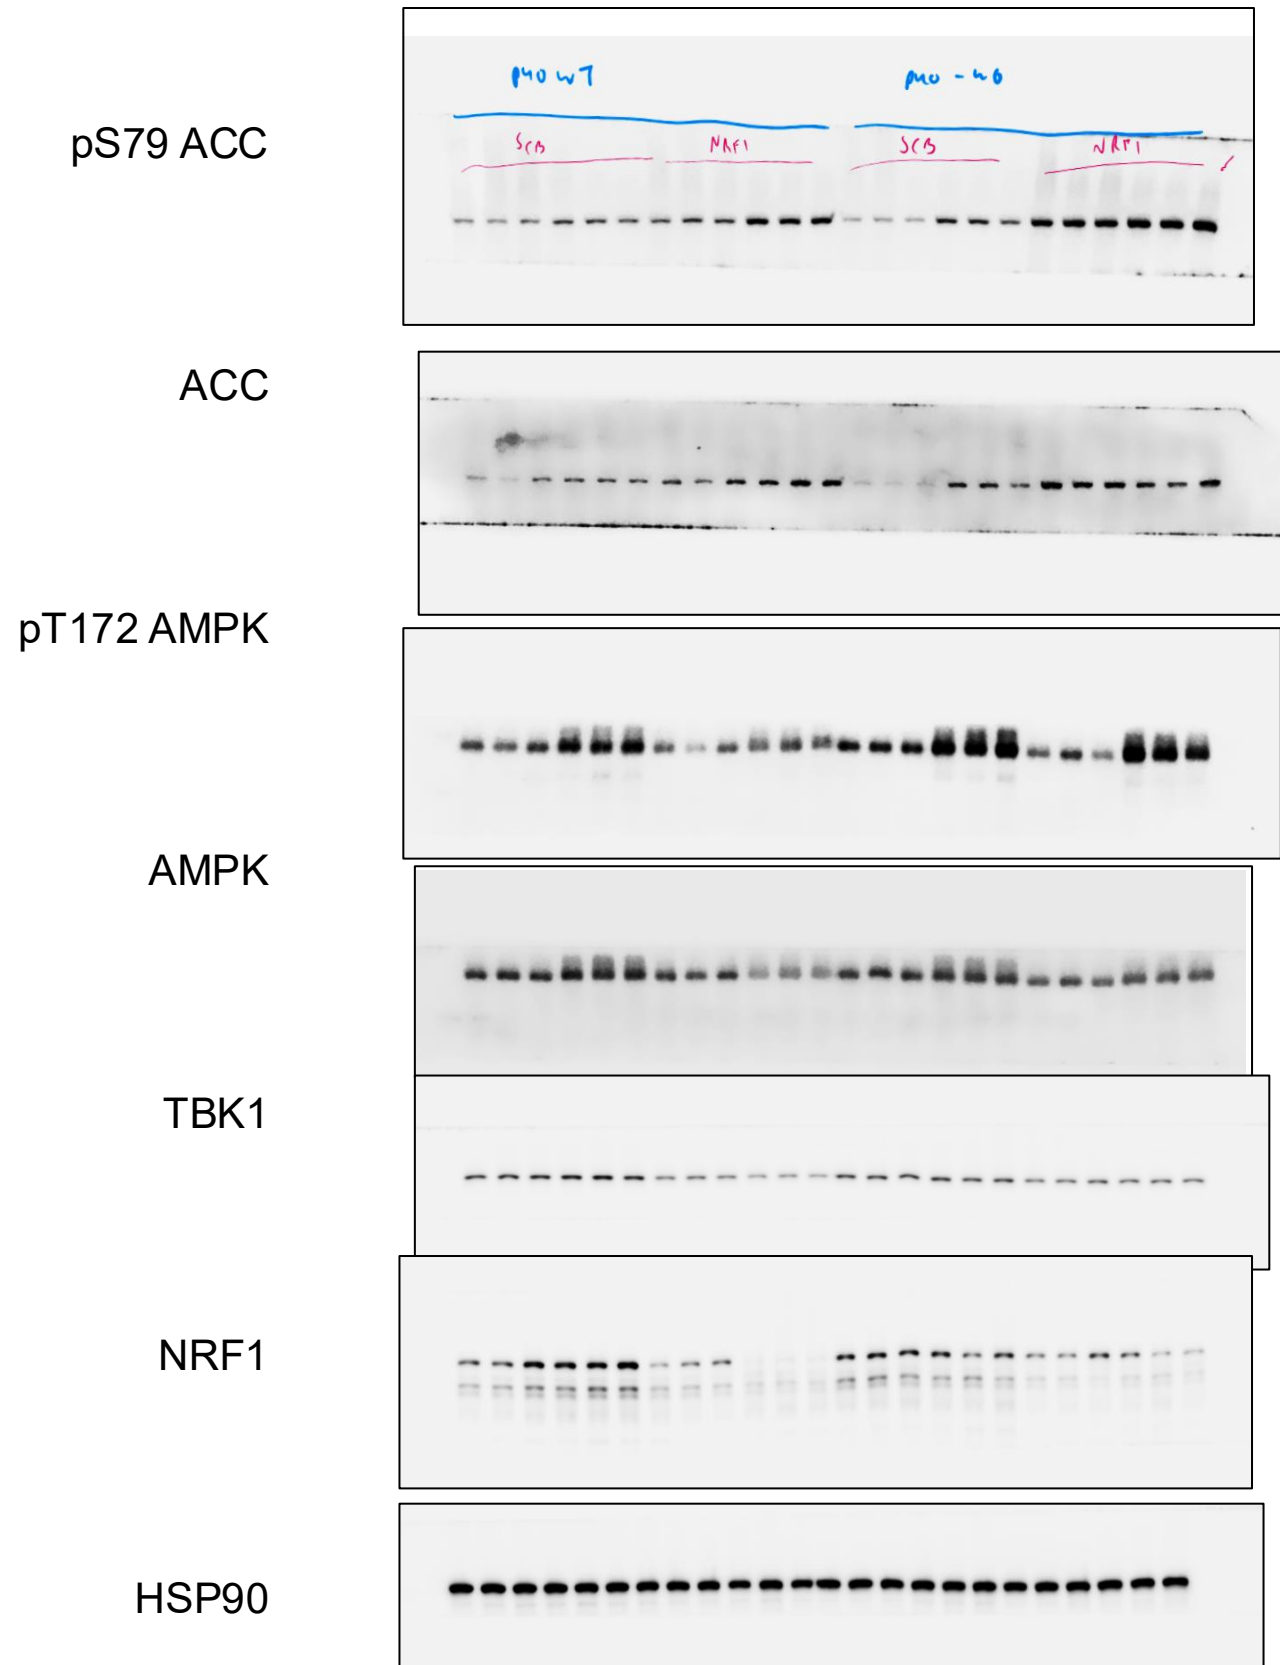

# Supplemental Fig 4A

pS79 ACC

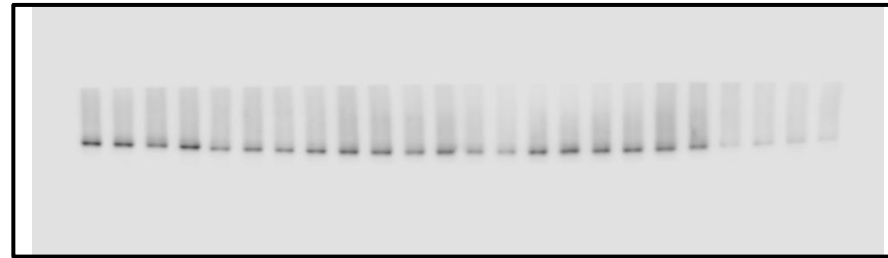

ACC

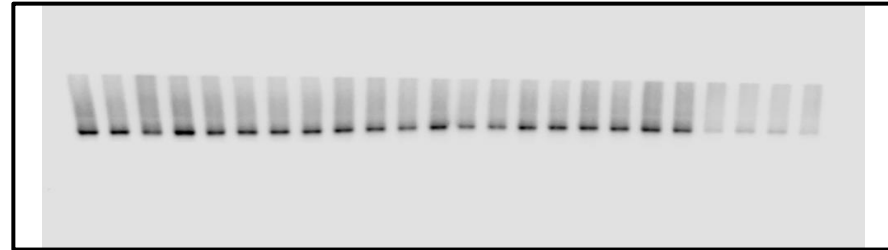

pT172 AMPK

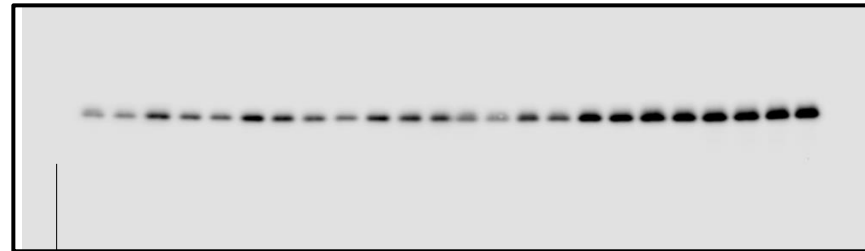

AMPK

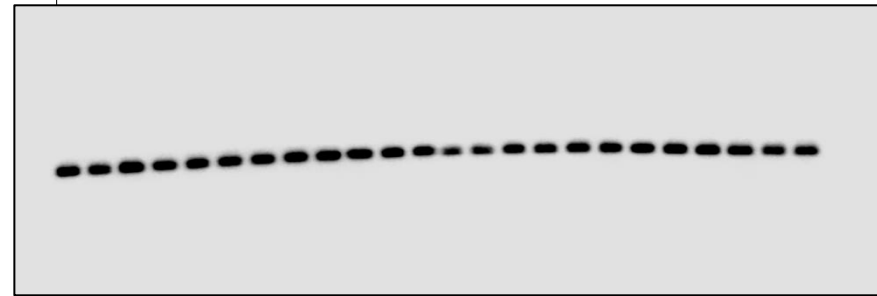

pS172 TBK1

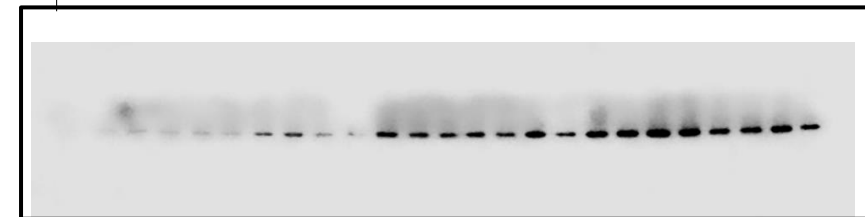

TBK1

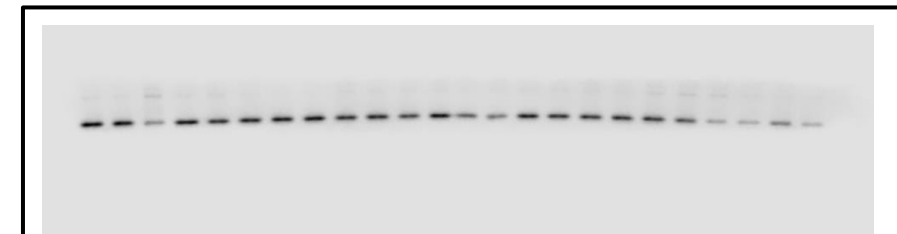

Ra1A

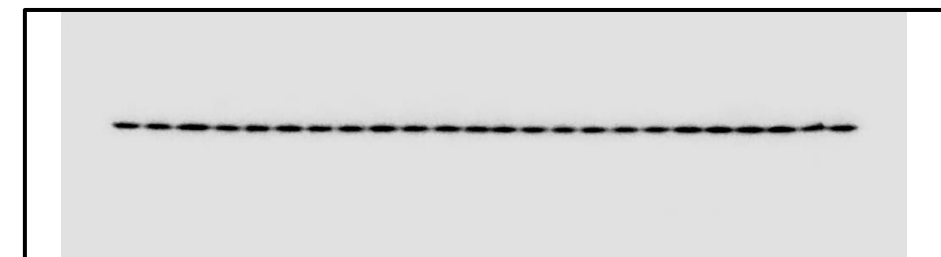

# Supplementary fig 5D

pS473 Akt

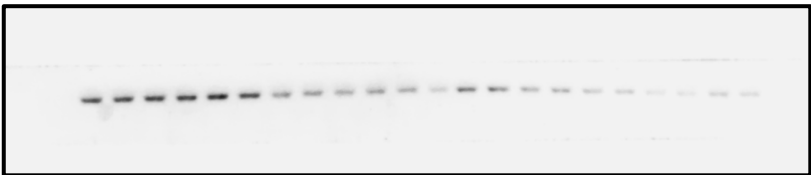

Akt

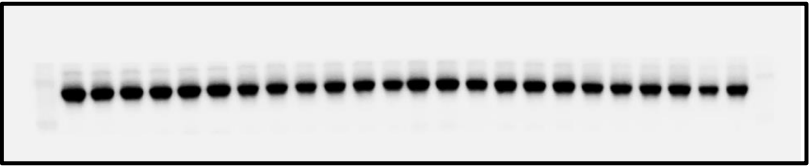

pT172 AMPK

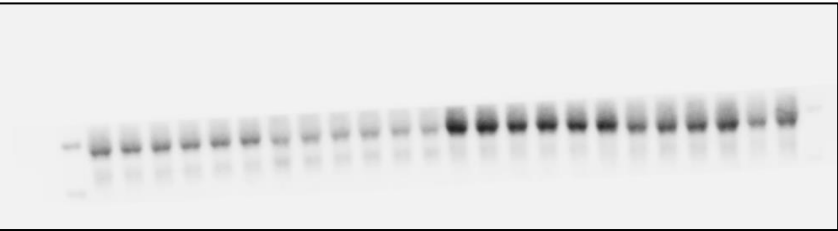

pS485 AMPK

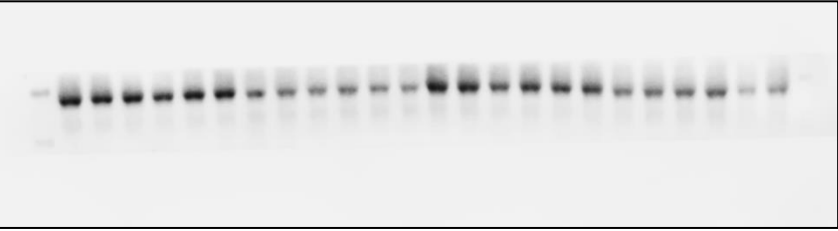

AMPK

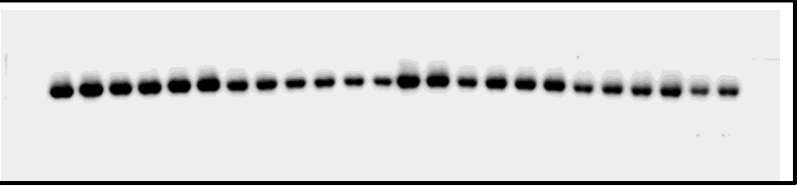

pS79 ACC

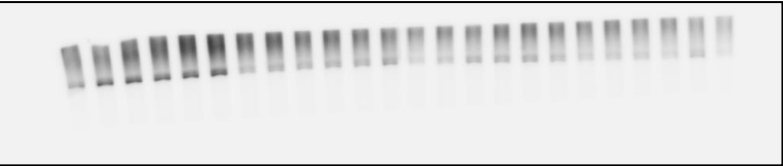

ACC

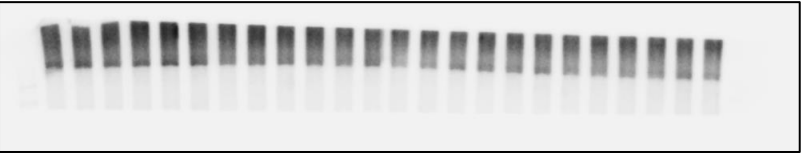

pS172 TBK1

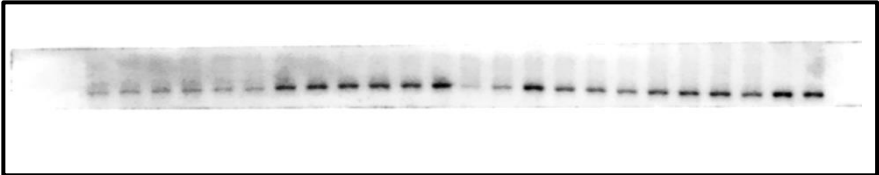

TBK1

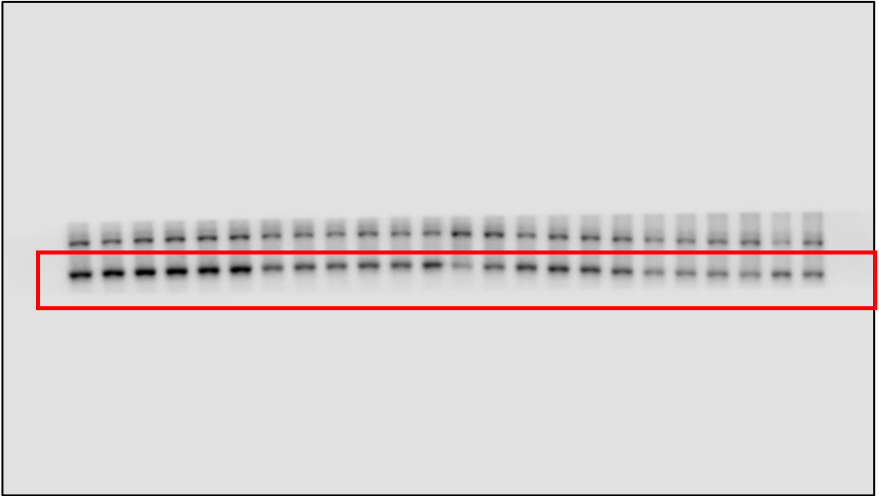

HSP90

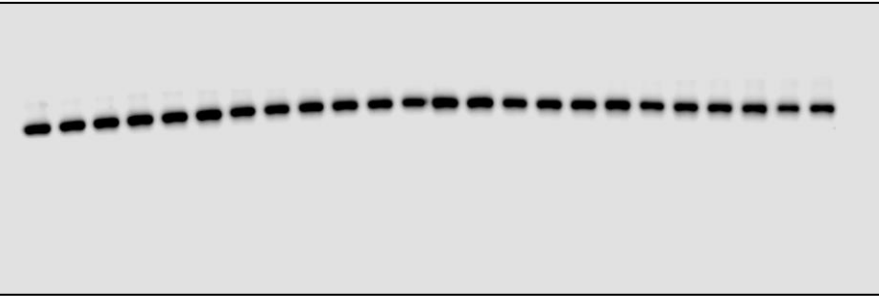

# Supplementary fig 6G

pT172 AMPK

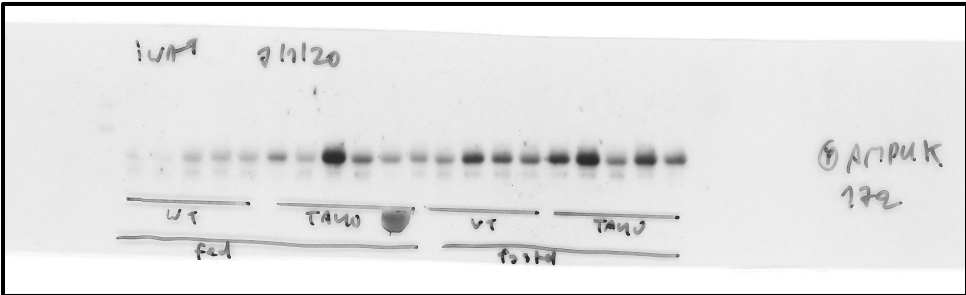

pS485 AMPK

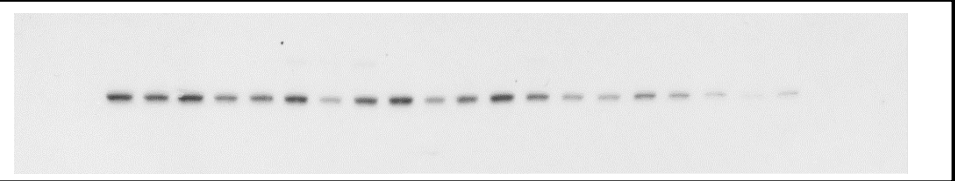

AMPK

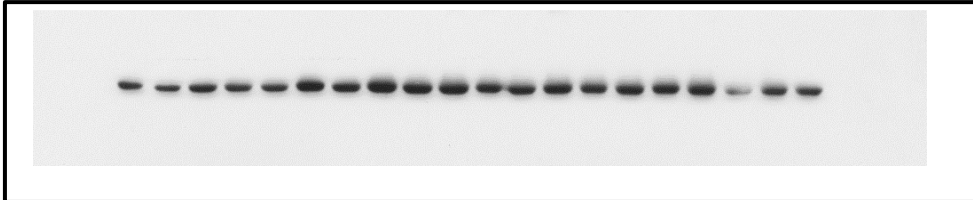

pACC

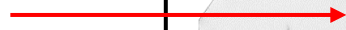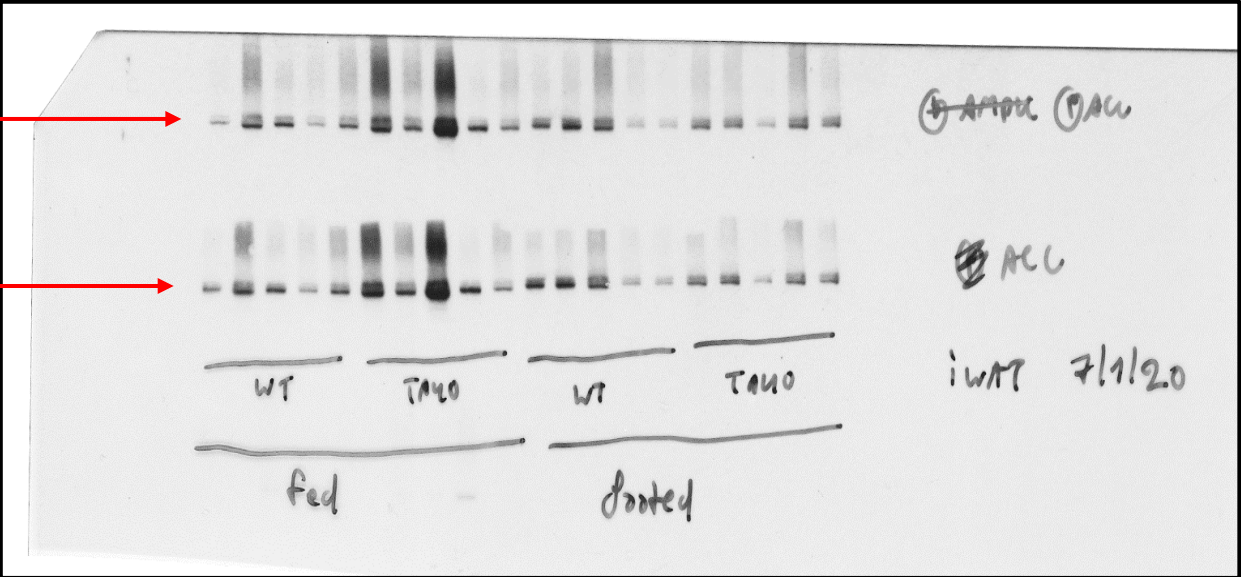

ACC

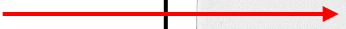

TBK1

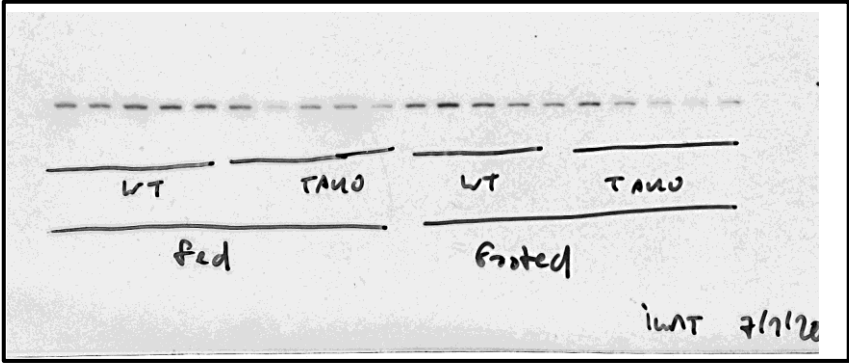

HSP90

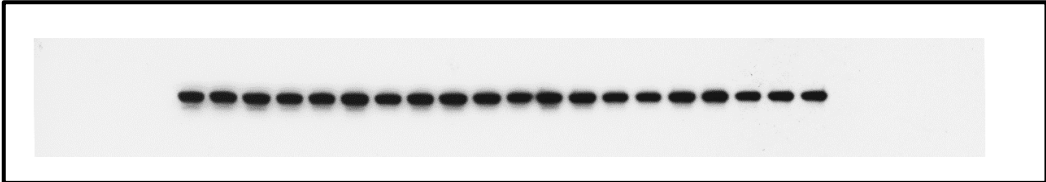

# Supplementary fig 7B

pS79 ACC

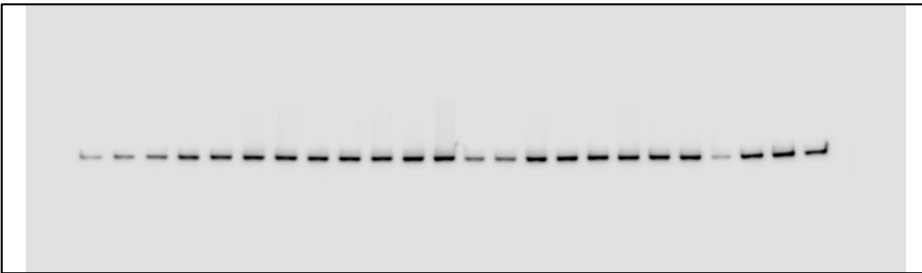

ACC

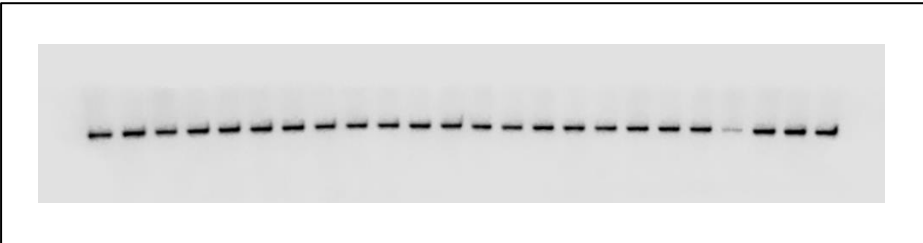

pT172 AMPK

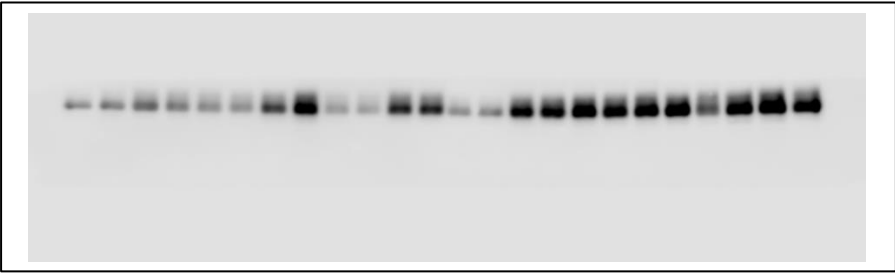

AMPK

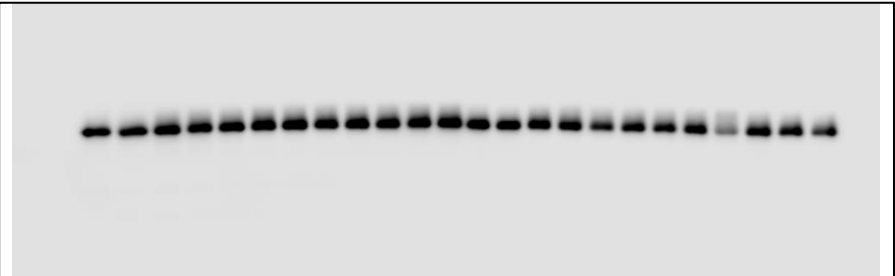

pS172 TBK1

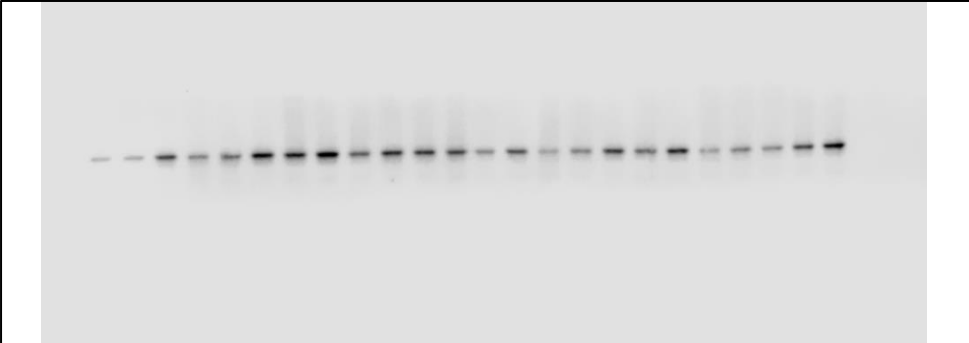

TBK1

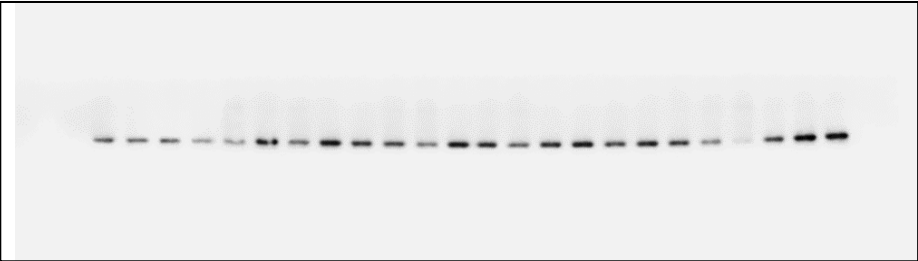

$\beta$  Tubulin

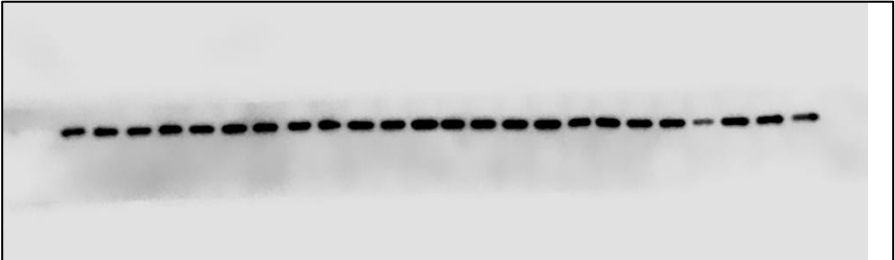

Figure 5F

pY1150/1151 IR $\beta$

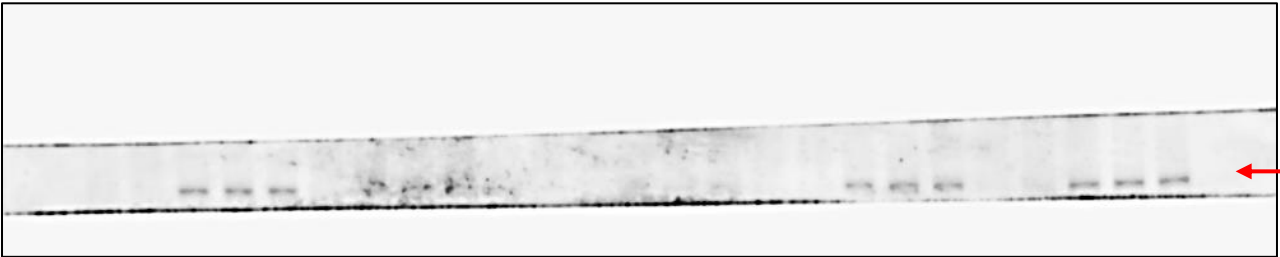

IR $\beta$

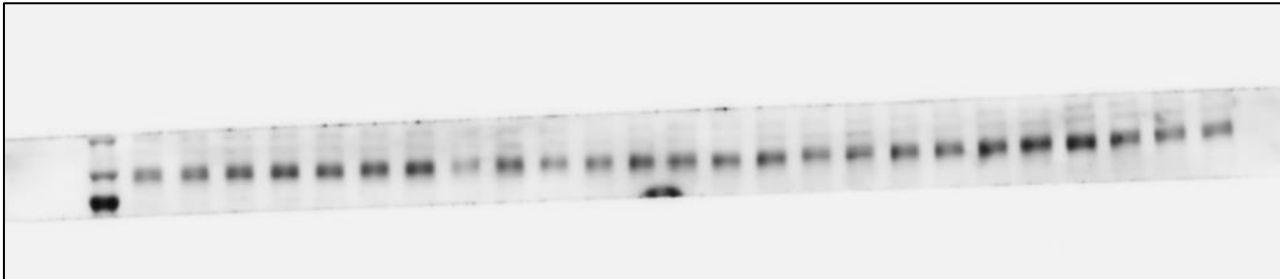

pS473 Akt

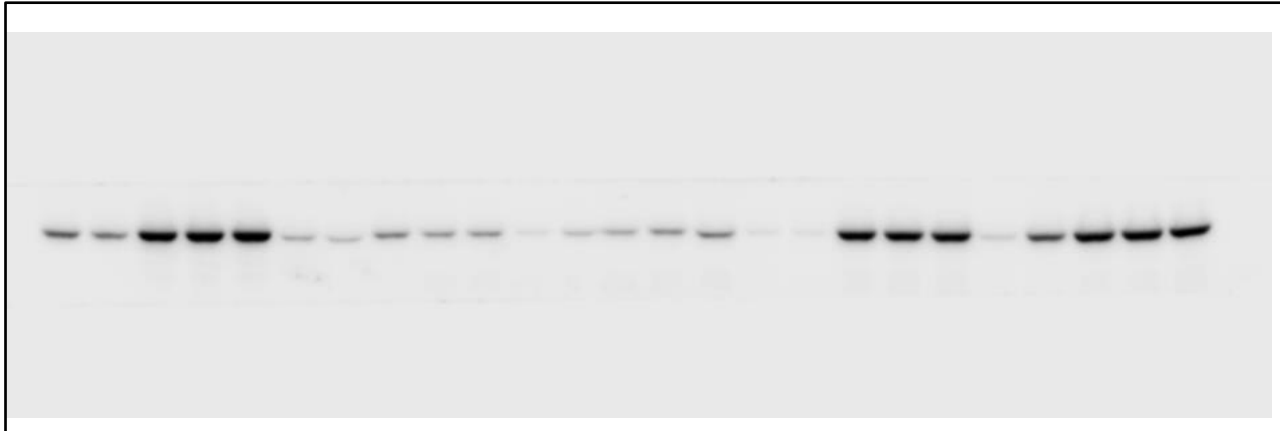

Akt

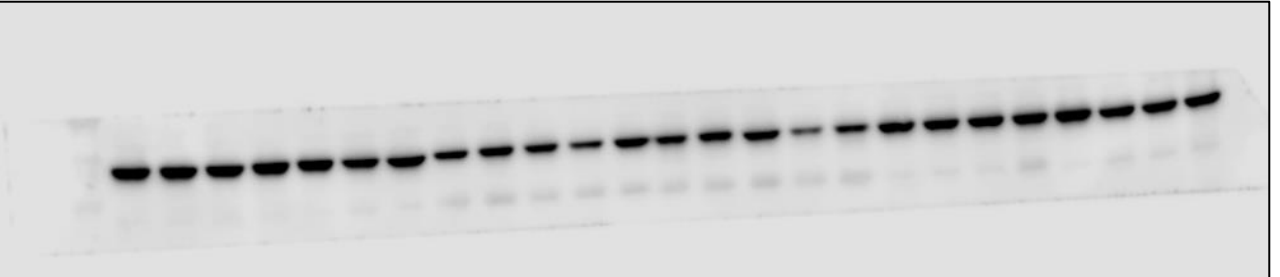

$\beta$  Tubulin

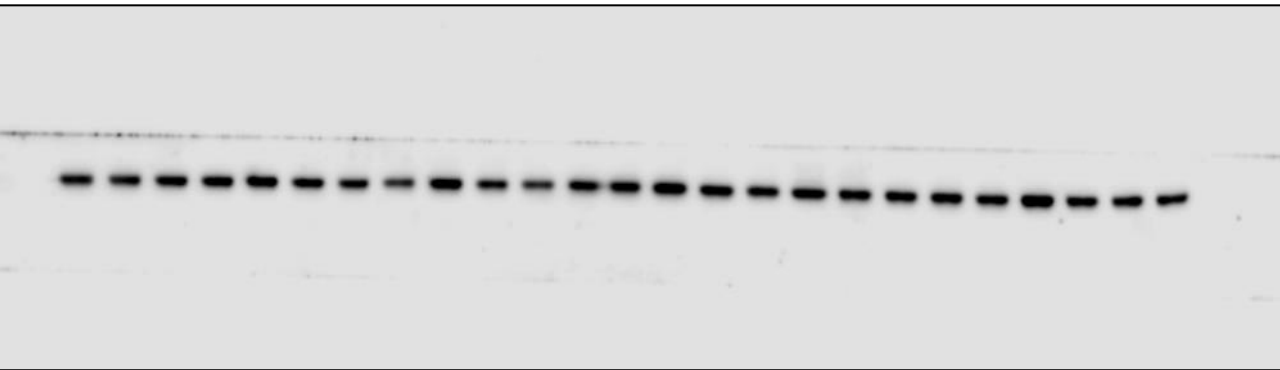



# Supplementary figure 9D

pS473 Akt

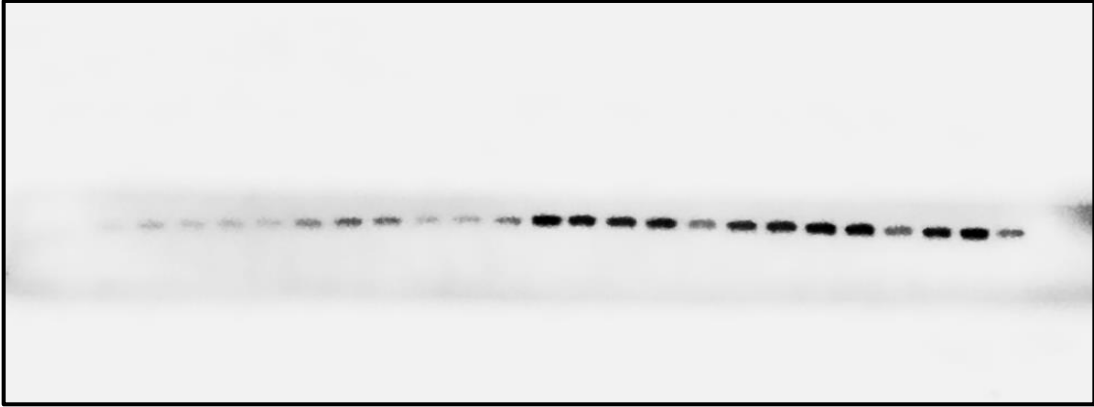

Akt

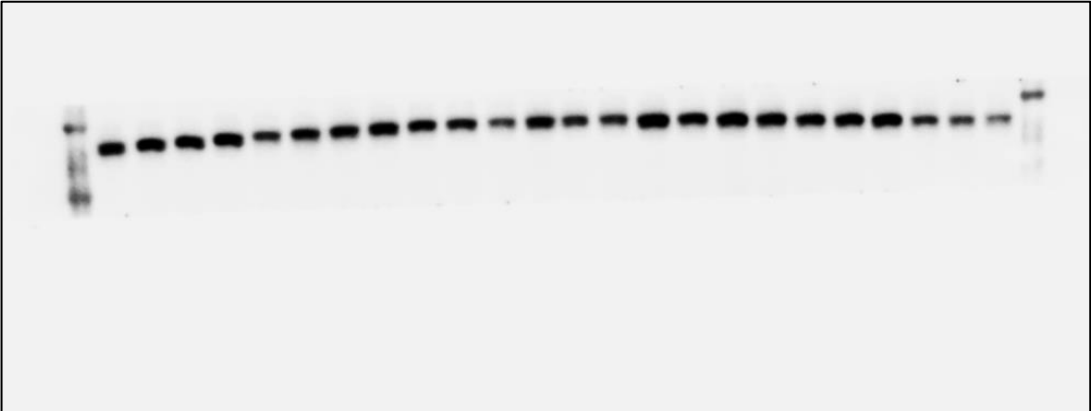

Supplement: sd2 [file 2]
